# Supplementary material
Source: PubMed Central journal article supplement (PMC10256687)
Supplement: 41541_2023_681_MOESM1_ESM.pdf [file 41541_2023_681_MOESM1_ESM.pdf]

# Myocarditis and Pericarditis in Adolescents Following COVID-19 BNT162b2 Vaccination: A Systematic Review and Meta-Analysis

---

## **Supplementary Materials**

### **Table of contents**

**Supplementary Table 1:** Characteristic of Studies Assessing the Risk of Myocarditis/ pericarditis after COVID-19 Pfizer-BioNTech (BNT162b2) mRNA Vaccination in Adolescents.

**Supplementary Table 2:** Risk of bias of included studies assessed with ROBINS-I (domains 1-5)

**Supplementary Table 3:** Risk of bias of included studies assessed with ROBINS-I (domains 6-9)

**Supplementary Figure 1:** Map showing geographical origins of included studies.

**Supplementary Figure 2:** Pooled proportion of myocarditis or of myocarditis/pericarditis following the first dose of BNT162b2 vaccination against COVID-19 among adolescents.

**Supplementary Figure 3:** Pooled proportion of myocarditis or of myocarditis/pericarditis following the second dose of BNT162b2 vaccination against COVID-19 among adolescents.

**Supplementary Figure 4:** Pooled proportion of myocarditis or pericarditis or of myocarditis/pericarditis following any dose of BNT162b2 vaccination against COVID-19 among adolescents.

**Supplementary Figure 5:** Pooled proportion of myocarditis or pericarditis or of myocarditis/pericarditis across all doses including booster dose of BNT162b2 vaccination against COVID-19 among adolescents.

**Supplementary Figure 6:** Pooled proportion of myocarditis or pericarditis or of myocarditis/pericarditis stratified by dose of BNT162b2 vaccination against COVID-19 among adolescents.

**Supplementary Figure 7:** Pooled proportion of myocarditis or of myocarditis/pericarditis following primary doses of BNT162b2 vaccination against COVID-19 among adolescents.

**Supplementary Figure 8:** Comparing rates of myocarditis or of myocarditis/pericarditis by gender after BNT162b2 vaccination against COVID-19 among adolescents.

**Supplementary Figure 9:** Pooled proportion of myocarditis or pericarditis or of myocarditis/pericarditis stratified by sex after BNT162b2 vaccination against COVID-19 among adolescents.

**Supplementary Figure 10:** Comparing rates of myocarditis or of myocarditis/pericarditis by gender after BNT162b2 vaccination against COVID-19 among adolescents.

**Supplementary Figure 11:** Pooled cumulative proportion of myocarditis or pericarditis or of myocarditis/pericarditis before and after seven reporting days of BNT162b2 vaccination against COVID-19 among adolescents.

**Supplementary Figure 12:** Pooled cumulative proportion of myocarditis or pericarditis or of myocarditis/pericarditis after each seven days period across all doses including booster dose of BNT162b2 vaccination against COVID-19 among adolescents.

**Supplementary Figure 13:** Pooled cumulative proportion of myocarditis or pericarditis or of myocarditis/pericarditis after each seven days period after the first (Panel A) and the second dose (Panel B) of BNT162b2 vaccination against COVID-19 among adolescents.

**Supplementary Figure 14:** Reporting of myopericarditis among adolescents aged 12-17 years using data from the passive surveillance, nested in the World Health Organisation database (VigiBase) of spontaneous reports.

**Supplementary Table 1: Characteristic of Studies Assessing the Risk of Myocarditis/ pericarditis after COVID-19 Pfizer-BioNTech (BNT162b2) mRNA Vaccination in Adolescents.**

---

| Author, Year, Design and Timeline                                                                                    | Age Group   | Time between vaccination and myocarditis event | Dose Type | Sex | Condition | Estimates | Estimates in vaccinated | Low Limit | Upper Limit | Author conclusion                                                                                                                                                                                                                        |
|----------------------------------------------------------------------------------------------------------------------|-------------|------------------------------------------------|-----------|-----|-----------|-----------|-------------------------|-----------|-------------|------------------------------------------------------------------------------------------------------------------------------------------------------------------------------------------------------------------------------------------|
| <b>Block et al. 2022<sup>1</sup>, US, Cohort study, hospital based, January 1- 2021- January 31, 2022; 13 months</b> | 12–17 years | 7 days                                         | 1         | M   | MD        | RR        | 23                      | 5.3       | 99.5        | *Data from 40 health care systems participating in a large network<br>*Risk for cardiac complications significantly higher after SARS-CoV-2 infection than after mRNA COVID-19 vaccination for both males and females in all age groups. |
|                                                                                                                      | 12–17 years | 21 days                                        | 1         | M   | MD        | RR        | 18                      | 5.4       | 60.6        |                                                                                                                                                                                                                                          |
|                                                                                                                      | 12–17 years | 7 days                                         | 2         | M   | MD        | RR        | 2.3                     | 1.2       | 4.4         |                                                                                                                                                                                                                                          |
|                                                                                                                      | 12–17 years | 21 days                                        | 2         | M   | MD        | RR        | 2.2                     | 1.2       | 4           |                                                                                                                                                                                                                                          |
|                                                                                                                      | 12–17 years | 7 days                                         | Any       | M   | MD        | RR        | 3.9                     | 2.1       | 7           |                                                                                                                                                                                                                                          |
|                                                                                                                      | 12–17 years | 21 days                                        | Any       | M   | MD        | RR        | 3.7                     | 2.1       | 6.4         |                                                                                                                                                                                                                                          |
|                                                                                                                      | 12–17 years | 7 days                                         | 1         | M   | M/P       | RR        | 25.7                    | 6         | 110.3       |                                                                                                                                                                                                                                          |
|                                                                                                                      | 12–17 years | 21 days                                        | 1         | M   | M/P       | RR        | 19.8                    | 5.9       | 66.2        |                                                                                                                                                                                                                                          |
|                                                                                                                      | 12–17 years | 7 days                                         | 2         | M   | M/P       | RR        | 2.1                     | 1.1       | 3.9         |                                                                                                                                                                                                                                          |
|                                                                                                                      | 12–17 years | 21 days                                        | 2         | M   | M/P       | RR        | 1.8                     | 1         | 3.1         |                                                                                                                                                                                                                                          |
|                                                                                                                      | 12–17 years | 7 days                                         | Any       | M   | M/P       | RR        | 3.5                     | 2         | 6.1         |                                                                                                                                                                                                                                          |
|                                                                                                                      | 12–17 years | 21 days                                        | Any       | M   | M/P       | RR        | 3                       | 1.8       | 5           |                                                                                                                                                                                                                                          |
|                                                                                                                      | 12–17 years | 7 days                                         | 1         | F   | MD        | RR        | 24.5                    | 3.1       | 193.3       |                                                                                                                                                                                                                                          |
|                                                                                                                      | 12–17 years | 21 days                                        | 1         | F   | MD        | RR        | 35.4                    | 4.6       | 270.5       |                                                                                                                                                                                                                                          |
|                                                                                                                      | 12–17 years | 7 days                                         | 2         | F   | MD        | RR        | 23.1                    | 2.9       | 182         |                                                                                                                                                                                                                                          |
|                                                                                                                      | 12–17 years | 21 days                                        | 2         | F   | MD        | RR        | 11.1                    | 3.2       | 39          |                                                                                                                                                                                                                                          |
|                                                                                                                      | 12–17 years | 7 days                                         | Any       | F   | MD        | RR        | 31.2                    | 6.7       | 144.3       |                                                                                                                                                                                                                                          |
|                                                                                                                      | 12–17 years | 21 days                                        | Any       | F   | MD        | RR        | 18                      | 6.4       | 50.5        |                                                                                                                                                                                                                                          |
|                                                                                                                      | 12–17 years | 7 days                                         | 1         | F   | M/P       | RR        | 12.2                    | 2.6       | 56.7        |                                                                                                                                                                                                                                          |
|                                                                                                                      | 12-17 years | 21 days                                        | 1         | F   | M/P       | RR        | 17.7                    | 4         | 78.4        |                                                                                                                                                                                                                                          |
| 12–17 years                                                                                                          | 7 days      | 2                                              | F         | M/P | RR        | 11.5      | 2.5                     | 18.7      |             |                                                                                                                                                                                                                                          |
| 12–17 years                                                                                                          | 21 days     | 2                                              | F         | M/P | RR        | 6.7       | 2.4                     | 18.7      |             |                                                                                                                                                                                                                                          |
| 12–17 years                                                                                                          | 7 days      | Any                                            | F         | M/P | RR        | 15.6      | 4.8                     | 50.6      |             |                                                                                                                                                                                                                                          |



|                                                                                                                                        |             |         |     |     |     |      |       |       |       |                                                                                                                                                                                                                                                                                                                                                                                                                                                  |
|----------------------------------------------------------------------------------------------------------------------------------------|-------------|---------|-----|-----|-----|------|-------|-------|-------|--------------------------------------------------------------------------------------------------------------------------------------------------------------------------------------------------------------------------------------------------------------------------------------------------------------------------------------------------------------------------------------------------------------------------------------------------|
|                                                                                                                                        | 12-17 years | 21 days | Any | F   | M/P | RR   | 10    | 4.3   | 23.4  |                                                                                                                                                                                                                                                                                                                                                                                                                                                  |
| <b>Chua et al., 2022<sup>2</sup>, China, Prospective cohort, 14 June 2021 and 4 September 2021</b>                                     | 12-17 years |         |     |     | MD  | RR   |       |       |       | *Significant increase in the risk of acute myocarditis/pericarditis following Comirnaty vaccination among<br>*Chinese male adolescents, especially after the second dose.                                                                                                                                                                                                                                                                        |
|                                                                                                                                        | 12-17 years | 14 days | 1   | M   | M/P | RD   | 5.36  | 0.65  | 10.07 |                                                                                                                                                                                                                                                                                                                                                                                                                                                  |
|                                                                                                                                        | 12-17 years | 14 days | 1   | F   | M/P | RD   |       |       |       |                                                                                                                                                                                                                                                                                                                                                                                                                                                  |
|                                                                                                                                        | 12-17 years | 14 days | 2   | M   | M/P | RD   | 37.1  | 25.1  | 49.12 |                                                                                                                                                                                                                                                                                                                                                                                                                                                  |
|                                                                                                                                        | 12-17 years | 14 days | 2   | F   | M/P | RD   |       |       |       |                                                                                                                                                                                                                                                                                                                                                                                                                                                  |
|                                                                                                                                        | 12-17 years | 14 days | 1   | All | M/P | RD   | 3.26  | -0.4  | 6.92  |                                                                                                                                                                                                                                                                                                                                                                                                                                                  |
|                                                                                                                                        | 12-17 years | 14 days | 2   | All | M/P | RD   | 21.1  | 12.06 | 30.16 |                                                                                                                                                                                                                                                                                                                                                                                                                                                  |
|                                                                                                                                        | 12-17 years | 14 days | Any | All | M/P | RD   | 18.4  | 9.95  | 26.87 |                                                                                                                                                                                                                                                                                                                                                                                                                                                  |
|                                                                                                                                        | 12-17 years | 14 days | Any | M   | M/P | RD   | 32.1  | 20.91 | 43.25 |                                                                                                                                                                                                                                                                                                                                                                                                                                                  |
|                                                                                                                                        | 12-17 years | 14 days | Any | F   | M/P | RD   |       |       |       |                                                                                                                                                                                                                                                                                                                                                                                                                                                  |
|                                                                                                                                        | 12-17 years | 28 days | 1   | M   | M/P | RD   | 6.72  | 1.13  | 12.31 |                                                                                                                                                                                                                                                                                                                                                                                                                                                  |
|                                                                                                                                        | 12-17 years | 28 days | 1   | F   | M/P | RD   |       |       |       |                                                                                                                                                                                                                                                                                                                                                                                                                                                  |
|                                                                                                                                        | 12-17 years | 28 days | 2   | M   | M/P | RD   | 38.2  | 25.85 | 50.51 |                                                                                                                                                                                                                                                                                                                                                                                                                                                  |
|                                                                                                                                        | 12-17 years | 28 days | 2   | F   | M/P | RD   |       |       |       |                                                                                                                                                                                                                                                                                                                                                                                                                                                  |
|                                                                                                                                        | 12-17 years | 28 days | 1   | All | M/P | RD   | 4.14  | -0.17 | 8.45  |                                                                                                                                                                                                                                                                                                                                                                                                                                                  |
|                                                                                                                                        | 12-17 years | 28 days | 2   | All | M/P | RD   | 22.4  | 13.01 | 31.87 |                                                                                                                                                                                                                                                                                                                                                                                                                                                  |
| 12-17 years                                                                                                                            | 28 days     | Any     | All | M/P | RD  | 19.3 | 10.53 | 28.05 |       |                                                                                                                                                                                                                                                                                                                                                                                                                                                  |
| 12-17 years                                                                                                                            | 28 days     | Any     | M   | M/P | RD  | 32.7 | 21.26 | 44.16 |       |                                                                                                                                                                                                                                                                                                                                                                                                                                                  |
| 12-17 years                                                                                                                            | 28 days     | Any     | F   | M/P | RD  |      |       |       |       |                                                                                                                                                                                                                                                                                                                                                                                                                                                  |
| <b>Chouchana et al., 2022<sup>3</sup>, WHO countries (VigiBase), Passive surveillance, nested in a database of spontaneous reports</b> | 12-17 years | any     | Any | M   | MD  | ROR  | 18.5  | 15.6  | 21.9  | *Inflammatory heart reactions may rarely occur shortly following mRNA COVID-19 vaccination.<br>* An important disproportionate reporting of myocarditis among adolescents' male patients,<br>*But reporting rates support a) a very rare risk, that does not seem to compromise the largely positive benefit-risk balance of these vaccines and b) a very rare incidence, lower than reports of myocarditis related to severe COVID-19 infection |
|                                                                                                                                        | 12-17 years | any     | Any | F   | MD  | ROR  | 7.8   | 5.1   | 12    |                                                                                                                                                                                                                                                                                                                                                                                                                                                  |
|                                                                                                                                        | 12-17 years | any     | Any | M   | PD  | ROR  | 3.7   | 2.6   | 5.1   |                                                                                                                                                                                                                                                                                                                                                                                                                                                  |
|                                                                                                                                        | 12-17 years | any     | Any | F   | PD  | ROR  | 0.8   | 0.3   | 2.3   |                                                                                                                                                                                                                                                                                                                                                                                                                                                  |
|                                                                                                                                        | 12-17 years | any     | Any | All | MD  | ROR  | 22.3  | 19.2  | 25.9  |                                                                                                                                                                                                                                                                                                                                                                                                                                                  |
|                                                                                                                                        | 12-17 years | any     | Any | All | PD  | ROR  | 3.7   | 3.2   | 4.2   |                                                                                                                                                                                                                                                                                                                                                                                                                                                  |

|                                                                                                                                                                     |                    |         |     |     |     |                  |      |      |      |                                                                                                                                                                                                                                                                                                                                            |
|---------------------------------------------------------------------------------------------------------------------------------------------------------------------|--------------------|---------|-----|-----|-----|------------------|------|------|------|--------------------------------------------------------------------------------------------------------------------------------------------------------------------------------------------------------------------------------------------------------------------------------------------------------------------------------------------|
| <b>registered up to 30 June 2021</b>                                                                                                                                |                    |         |     |     |     |                  |      |      |      |                                                                                                                                                                                                                                                                                                                                            |
| <b>Karlstad et al., 2022<sup>4</sup>, Denmark, Finland, Norway, and Sweden, cohort study, December 27, 2020 to October 5, 2021</b>                                  | 12 years or older. | 28 days | Any | M   | MD  | IRR              | 1.4  | 1.09 | 1.8  | *A large cohort study; both first and second doses of mRNA vaccines associated with increased risk of myocarditis and pericarditis.<br>*Findings compatible with between 4 and 7 excess events in 28 days per 100 000 vaccinees after BNT162b2<br>*Risk to be balanced against the benefits of protecting against severe COVID-19 disease. |
|                                                                                                                                                                     | 12 years or older  | 28 days | Any |     | MD  | IRR              | 1.46 | 1.01 | 2.11 |                                                                                                                                                                                                                                                                                                                                            |
| <b>Li et al., 2022<sup>5</sup>, Hong Kong-China, Prospective cohort study, population based, March 10 and October 18, 2021</b>                                      | 12-17 years        |         | 1   | All | MD  | Risk per 100.000 | 3.12 |      |      | *Single-dose regimen associated with reduction in myocarditis risk among vaccinated adolescents.                                                                                                                                                                                                                                           |
|                                                                                                                                                                     | 12-17 years        |         | 2   | All | MD  | Risk per 100.000 | 22.2 |      |      |                                                                                                                                                                                                                                                                                                                                            |
|                                                                                                                                                                     | 12-17 years        |         | 1   | M   | MD  | Risk per 100.000 | 5.27 |      |      |                                                                                                                                                                                                                                                                                                                                            |
|                                                                                                                                                                     | 12-17 years        |         | 2   | M   | MD  | Risk per 100.000 | 39   |      |      |                                                                                                                                                                                                                                                                                                                                            |
|                                                                                                                                                                     | 12-17 years        |         | 1   | F   | MD  | Risk per 100.000 | 0.9  |      |      |                                                                                                                                                                                                                                                                                                                                            |
|                                                                                                                                                                     | 12-17 years        |         | 2   | F   | MD  | Risk per 100.000 | 4.97 |      |      |                                                                                                                                                                                                                                                                                                                                            |
| <b>Funk et al., 2022<sup>6</sup>, United states of America, simulation study with sensitivity analysis of the benefits and risks of the vaccine across possible</b> | 16-17 years        | any     | Any | M   | M/P | Risk per 100.000 | 42.9 |      |      | *Benefits of the vaccine outweigh its risks for all age and sex subgroups we analyze in this study.<br>*Uncertainties exist in this assessment as both benefits and risks of vaccination may change with the continuing evolution of the pandemic.                                                                                         |
|                                                                                                                                                                     | 16-17 years        | any     | Any | F   | M/P | Risk per 100.000 | 47.9 |      |      |                                                                                                                                                                                                                                                                                                                                            |
|                                                                                                                                                                     | 16-17 years        | any     | Any | M   | M/P | Rate of excess   | 196  | 36   | 424  |                                                                                                                                                                                                                                                                                                                                            |

| pandemic scenarios                                                                              |             |          |       |        |         | mortality                |      |      |      |
|-------------------------------------------------------------------------------------------------|-------------|----------|-------|--------|---------|--------------------------|------|------|------|
|                                                                                                 | Age         | Duration | Cases | Gender | Setting | Rate of excess mortality | Rate | Rate | Rate |
| pandemic scenarios                                                                              | 16-17 years | any      | Any   | F      | M/P     | Rate of excess mortality | 36   | 0    | 298  |
|                                                                                                 | 16-17 years | any      |       | M      | M/P     | Rate of excess mortality | 196  | 36   | 424  |
|                                                                                                 | 16-17 years |          |       | F      | M/P     |                          | 36   | 0    | 298  |
| <b>Krug et al., 2022<sup>7</sup>, USA, passive surveillance, 1 January 2021 to 18 June 2021</b> | 12-15 years | 7 days   | 1     | M      | M/P     | Risk per 100.000         | 1.14 |      |      |
|                                                                                                 | 12-15 years | 7 days   | 2     | M      | M/P     | Risk per 100.000         | 16.2 |      |      |
|                                                                                                 | 12-15 years | 7 days   | 1     | F      | M/P     | Risk per 100.000         | 0    |      |      |
|                                                                                                 | 12-15 years | 7 days   | 2     | F      | M/P     | Risk per 100.000         | 1.3  |      |      |
|                                                                                                 | 16-17 years | 7 days   | 1     | M      | M/P     | Risk per 100.000         | 0.82 |      |      |
|                                                                                                 | 16-17 years | 7 days   | 2     | M      | M/P     | Risk per 100.000         | 9.3  |      |      |
|                                                                                                 | 16-17 years | 7 days   | 1     | F      | M/P     | Risk per 100.000         | 0.14 |      |      |
|                                                                                                 | 16-17 years | 7 days   | 2     | F      | M/P     | Risk per                 | 1.25 |      |      |

\*Findings strongly support individualized pediatric COVID-19 vaccination strategies which weigh protection against severe disease vs. risks of vaccine-associated myo/pericarditis. \*Research needed into the nature and implications of this adverse effect and immunization strategies which reduce harms in this overall low risk cohort.

|                                                                                                                           |             |        |   |   |        |                 |      |                                                                                                                                                                                                                                                                                                                                         |
|---------------------------------------------------------------------------------------------------------------------------|-------------|--------|---|---|--------|-----------------|------|-----------------------------------------------------------------------------------------------------------------------------------------------------------------------------------------------------------------------------------------------------------------------------------------------------------------------------------------|
|                                                                                                                           |             |        |   |   | 100.00 |                 |      |                                                                                                                                                                                                                                                                                                                                         |
|                                                                                                                           | 12-17 years | 7 days | 1 | M | M/P    | Risk per 100.00 | 0.1  |                                                                                                                                                                                                                                                                                                                                         |
|                                                                                                                           | 12-17 years | 7 days | 2 | M | M/P    | Risk per 100.00 | 11.9 |                                                                                                                                                                                                                                                                                                                                         |
|                                                                                                                           | 12-17 years | 7 days | 1 | F | M/P    | Risk per 100.00 | 0.06 |                                                                                                                                                                                                                                                                                                                                         |
|                                                                                                                           | 12-17 years | 7 days | 2 | F | M/P    | Risk per 100.00 | 1.27 |                                                                                                                                                                                                                                                                                                                                         |
| <b>Nygaard et al., 2022<sup>8</sup>, Denmark, Prospective population-based cohort study, May 15 to September 15, 2021</b> | 12-17 years |        | 1 | M | M/P    | Risk per 100.00 | 9.7  | *Incidence of myopericarditis after COVID-19 vaccination among males appears higher than reports from the United States.                                                                                                                                                                                                                |
|                                                                                                                           | 12-17 years |        | 1 | F | M/P    | Risk per 100.00 | 1.6  |                                                                                                                                                                                                                                                                                                                                         |
| <b>Oster et al., 2022<sup>9</sup>, United State of America, passive surveillance, December 2020 to August 2021</b>        | 12-15 years |        | 1 | M | MD     | Risk per 100.00 | 0.71 | *Based on passive surveillance reporting in the US, the risk of myocarditis after receiving mRNA-based COVID-19 vaccines increased across multiple age and sex strata and highest after the second vaccination dose in adolescent males and young men.<br>*Risk to be considered in the context of the benefits of COVID-19 vaccination |
|                                                                                                                           | 12-15 years |        | 2 | M | MD     | Risk per 100.00 | 7.1  |                                                                                                                                                                                                                                                                                                                                         |
|                                                                                                                           | 12-15 years |        | 1 | F | MD     | Risk per 100.00 | 0.05 |                                                                                                                                                                                                                                                                                                                                         |
|                                                                                                                           | 12-15 years |        | 2 | F | MD     | Risk per 100.00 | 0.64 |                                                                                                                                                                                                                                                                                                                                         |
|                                                                                                                           | 16-17 years |        | 1 | M | MD     | Risk per        | 0.72 |                                                                                                                                                                                                                                                                                                                                         |

|                                                                                                                                                       |             |     |     |        |                 |      |
|-------------------------------------------------------------------------------------------------------------------------------------------------------|-------------|-----|-----|--------|-----------------|------|
|                                                                                                                                                       |             |     |     | 100.00 |                 |      |
|                                                                                                                                                       | 16-17 years | 2   | M   | MD     | Risk per 100.00 | 10.6 |
|                                                                                                                                                       | 16-17 years | 1   | F   | MD     | Risk per 100.00 | 0.08 |
|                                                                                                                                                       | 16-17 years | 2   | F   | MD     | Risk per 100.00 | 1.1  |
| <b>Yap et al., 2022<sup>10</sup>, Singapore, Retrospective review of HSA vaccine adverse event (Passive surveillance), 21 June 2021- 25 July 2021</b> | 12-19 years | Any | M   | MD     | Risk per 100.00 | 3.72 |
|                                                                                                                                                       | 12-19 years | Any | F   | MD     | Risk per 100.00 | 0    |
|                                                                                                                                                       | 12-19 years | Any | All | MD     | Risk per 100.00 | 1.91 |
|                                                                                                                                                       | 12-19 years | Any | M   | PD     | Risk per 100.00 | 1.11 |
|                                                                                                                                                       | 12-19 years | Any | F   | PD     | Risk per 100.00 | 0    |
|                                                                                                                                                       | 12-19 years | Any | All | PD     | Risk per 100.00 | 0.57 |
|                                                                                                                                                       | 12-19 years | Any | M   | M/P    | Risk per 100.00 | 4.8  |
|                                                                                                                                                       | 12-19 years | Any | F   | M/P    | Risk per        | 0    |

\*Data from the national registry in Singapore indicate an increased incidence of pericarditis and myocarditis in younger men after COVID-19 mRNA vaccination

|                                                                                                                                           |             |     |      |          |     |                            |      |      |      |  |                                                                                                                                                                                                                                                                                                             |
|-------------------------------------------------------------------------------------------------------------------------------------------|-------------|-----|------|----------|-----|----------------------------|------|------|------|--|-------------------------------------------------------------------------------------------------------------------------------------------------------------------------------------------------------------------------------------------------------------------------------------------------------------|
|                                                                                                                                           |             |     |      |          |     | 100.0<br>00                |      |      |      |  |                                                                                                                                                                                                                                                                                                             |
|                                                                                                                                           | 12-19 years |     | Any  | All      | M/P | Risk<br>per<br>100.0<br>00 | 2.48 |      |      |  |                                                                                                                                                                                                                                                                                                             |
| <b>Das et al., 2021<sup>11</sup>, United States of America, Retrospective cohort, May 10, 2021, and June 20, 2021</b>                     | 12-18 years | any | Any  |          | M/P | Risk<br>per<br>100.0<br>00 |      |      |      |  | *Data suggest that symptoms owing to myopericarditis after the mRNA COVID-19 vaccination tend to be mild and transient.                                                                                                                                                                                     |
| <b>Foltran et al., 2021<sup>12</sup>, VigiBase/WHO, Retrospective review (Passive surveillance), 1 January 2021 and 14 September 2021</b> | 12-17 years | any | Any  | All      | M/P | Risk<br>per<br>100.0<br>00 | 5    |      |      |  | *This investigation including only adolescent data suggests for the first time that the second dose of mRNA COVID-19 vaccines increases the risk of reporting myocarditis/pericarditis compared with the first dose particularly in boys without significant difference between tozinameran and elasmoplan. |
|                                                                                                                                           | 12-17 years | any | 2vs1 | All      | MD  | ROR                        | 4.98 | 3.05 | 8.27 |  |                                                                                                                                                                                                                                                                                                             |
|                                                                                                                                           | 12-17 years | any | 2vs1 | All      | PD  | ROR                        | 5.44 | 2.01 | 16.1 |  |                                                                                                                                                                                                                                                                                                             |
|                                                                                                                                           | 12-17 years | any | 2vs1 | All      | M/P | ROR                        | 4.95 | 3.14 | 7.89 |  |                                                                                                                                                                                                                                                                                                             |
|                                                                                                                                           | 12-17 years | any | Any  | Mvs<br>F | MD  | ROR                        | 14.9 | 7.63 | 33.6 |  |                                                                                                                                                                                                                                                                                                             |
|                                                                                                                                           | 12-17 years | any | 1    | Mvs<br>F | M/P | ROR                        | 10.1 | 4.26 | 29.6 |  |                                                                                                                                                                                                                                                                                                             |
|                                                                                                                                           | 12-17 years | any | 2    | Mvs<br>F | M/P | ROR                        | 10.2 | 4.88 | 25   |  |                                                                                                                                                                                                                                                                                                             |
| <b>Gurdasani et al., 2021<sup>13</sup>, United Kingdom, Risk-benefit analysis/modelling, 1 July 2020 and 31 March 2021.</b>               | 12-17 years |     | 1    | M        | M/P | Risk<br>per<br>100.0<br>00 | 0.7  |      |      |  | *Given the current (as of 15 September 2021) high case rates (680/100,000 population/week in 10-19-year-old) in England, findings support vaccination of adolescents against SARS-CoV2.                                                                                                                     |
|                                                                                                                                           | 12-17 years |     | 2    | M        | M/P | Risk<br>per<br>100.0<br>00 | 6.3  |      |      |  |                                                                                                                                                                                                                                                                                                             |
|                                                                                                                                           | 12-17 years |     | 1    | F        | M/P | Risk<br>per<br>100.0<br>00 | 0    |      |      |  |                                                                                                                                                                                                                                                                                                             |
|                                                                                                                                           | 12-17 years |     | 2    | F        | M/P | Risk<br>per<br>100.0<br>00 | 0.9  |      |      |  |                                                                                                                                                                                                                                                                                                             |

|                                                                                                                         |                                                                          |         |      |     |     |                     |                                |       |       |                                                                                                                                                                                                                                                                                                                                                                                |                                                                                                                                                                                                                                                                                                                                                                                                                                                                       |
|-------------------------------------------------------------------------------------------------------------------------|--------------------------------------------------------------------------|---------|------|-----|-----|---------------------|--------------------------------|-------|-------|--------------------------------------------------------------------------------------------------------------------------------------------------------------------------------------------------------------------------------------------------------------------------------------------------------------------------------------------------------------------------------|-----------------------------------------------------------------------------------------------------------------------------------------------------------------------------------------------------------------------------------------------------------------------------------------------------------------------------------------------------------------------------------------------------------------------------------------------------------------------|
|                                                                                                                         | 12–17 years                                                              |         | Any  | All | M/P | Death               | 4                              |       |       |                                                                                                                                                                                                                                                                                                                                                                                |                                                                                                                                                                                                                                                                                                                                                                                                                                                                       |
|                                                                                                                         | 12–17 years                                                              |         |      |     | M/P | Death               | 0                              |       |       |                                                                                                                                                                                                                                                                                                                                                                                |                                                                                                                                                                                                                                                                                                                                                                                                                                                                       |
| <b>Dagan, M.D., 2021<sup>14</sup>, Tel Aviv, Israel, target trial emulation, December 20, 2020, to February 1, 2021</b> | 16-39 years                                                              | 42 days | Any  |     | MD  | RR                  |                                |       |       |                                                                                                                                                                                                                                                                                                                                                                                | *Risk of myocarditis, increased after both vaccination and SARS-CoV-2 infection. *After vaccination, the risk increased mostly among young male adolescents and adults (16 to 39 years of age), with 8.62 excess events per 100,000 persons *After infection, the risk was increased in both age categories (<40 and ≥40 years) and in both male and female adolescents and adults, with 11.54 excess events per 100,000 persons in young male adolescents and adults |
|                                                                                                                         | 16-39 years                                                              |         | Any  | M   | MD  | RR                  | 8.62                           | 2.8   | 14.35 |                                                                                                                                                                                                                                                                                                                                                                                |                                                                                                                                                                                                                                                                                                                                                                                                                                                                       |
|                                                                                                                         | 16-39 years                                                              |         | Any  | F   | MD  | RR                  | -0.63                          | -1.9  | 0     |                                                                                                                                                                                                                                                                                                                                                                                |                                                                                                                                                                                                                                                                                                                                                                                                                                                                       |
|                                                                                                                         | 16-39 years                                                              |         | Any  |     | PD  | RR                  |                                |       |       |                                                                                                                                                                                                                                                                                                                                                                                |                                                                                                                                                                                                                                                                                                                                                                                                                                                                       |
|                                                                                                                         | 16-39 years                                                              |         | Any  | M   | PD  | RR                  | 5.28                           | 0.17  | 10.33 |                                                                                                                                                                                                                                                                                                                                                                                |                                                                                                                                                                                                                                                                                                                                                                                                                                                                       |
|                                                                                                                         | 16-39 years                                                              |         | Any  | F   | PD  | RR                  | 0.54                           | 0     | 1.89  |                                                                                                                                                                                                                                                                                                                                                                                |                                                                                                                                                                                                                                                                                                                                                                                                                                                                       |
| <b>Hause 2021<sup>15</sup>, USA, passive and active surveillance data, December 14, 2020–July 16, 2021</b>              | 12-17 years                                                              |         | Any  | All | M/P | Reported proportion | 40% of serious events reported |       |       | Local and systemic reactions after vaccination with Pfizer-BioNTech vaccine were commonly reported by adolescents aged 12–17 years to U.S. vaccine safety monitoring systems, especially after dose 2. A small proportion of these reactions are consistent with myocarditis                                                                                                   |                                                                                                                                                                                                                                                                                                                                                                                                                                                                       |
| <b>Hause 2022<sup>16</sup>, USA, passive and active surveillance, December 9, 2021–February 20, 2022</b>                | 12-17 years                                                              |         | 3    | All | M/P | Reported proportion | 61% of serious events reported |       |       | *Myocarditis, less frequently reported after a booster dose than a second primary dose.                                                                                                                                                                                                                                                                                        |                                                                                                                                                                                                                                                                                                                                                                                                                                                                       |
| <b>Mevorach 2022<sup>17</sup>, Israel, retrospective cohort, December 20, 2020, to May 31, 2021</b>                     | 16-19 years                                                              | 21 days | 2vs1 | M   | MD  | RD                  | 13.7                           | 8.11  | 19.46 | *Incidence of myocarditis, although low, increased after the receipt of the BNT162b2 vaccine, particularly after the second dose among young male recipients. *Clinical presentation of myocarditis after vaccination usually mild.                                                                                                                                            |                                                                                                                                                                                                                                                                                                                                                                                                                                                                       |
|                                                                                                                         | 16-19 years                                                              | 21 days | 2vs1 | F   | MD  | RD                  | 1                              | -0.63 | 2.72  |                                                                                                                                                                                                                                                                                                                                                                                |                                                                                                                                                                                                                                                                                                                                                                                                                                                                       |
| <b>Jain 2021<sup>18</sup>, USA, Retrospective multicenter study across 16 US hospital, March 2021 and June 2021</b>     | <21 years, average 15.6 years, range 12-20 years., 94% received BNT162b2 | 14 days | Any  | All | M/P | Death               | 0                              |       |       | *Clinical characteristics and early outcomes, similar between different pediatric age groups in C-VAM. *Hospital course is mild, with quick clinical recovery and excellent short-term outcomes. *Myocardial injury and edema noted on CMR. *Close follow-up and further studies needed to understand long-term implications and mechanism of these myocardial tissue changes. |                                                                                                                                                                                                                                                                                                                                                                                                                                                                       |

|                                                                                                                                           |                                                                                   |                    |        |            |            |                  |               |              |                 |                                                                                                                                                                                                                                                                                                                                                                                                                                                                                                                   |                                                                                                                                                                        |
|-------------------------------------------------------------------------------------------------------------------------------------------|-----------------------------------------------------------------------------------|--------------------|--------|------------|------------|------------------|---------------|--------------|-----------------|-------------------------------------------------------------------------------------------------------------------------------------------------------------------------------------------------------------------------------------------------------------------------------------------------------------------------------------------------------------------------------------------------------------------------------------------------------------------------------------------------------------------|------------------------------------------------------------------------------------------------------------------------------------------------------------------------|
| <b>June-Choe 2021<sup>19</sup>, South Korea, Retrospective cohort, from July 2021-?</b>                                                   | From 10th grade to 12th grade (around 16–18 years of age)                         | 21 days<br>30 days | 1<br>2 | All<br>All | M/P<br>M/P | Risk per 100.000 | 1.8<br>4.3    |              |                 |                                                                                                                                                                                                                                                                                                                                                                                                                                                                                                                   | *BNT162b2 vaccination was safe and associated with a significantly lower risk of SARS-CoV-2 infection,<br>*Vaccination in adolescent may reduce the burden of Covid-19 |
|                                                                                                                                           |                                                                                   |                    |        |            |            |                  |               |              |                 |                                                                                                                                                                                                                                                                                                                                                                                                                                                                                                                   |                                                                                                                                                                        |
| <b>Lai 2021<sup>20</sup>, Hong Kong, Population-based retrospective cohort,</b>                                                           | Adolescents aged 12–18 with a territory-wide electronic health care database      | 28 days<br>28 days | 1<br>2 | All<br>All | MD<br>MD   | IRR              | 9.15<br>29.61 | 1.14<br>4.04 | 73.16<br>217.07 | *Overall absolute risk of AESIs was low with no evidence of an increased risk of AESIs except myocarditis and sleeping disturbances/disorders.                                                                                                                                                                                                                                                                                                                                                                    |                                                                                                                                                                        |
|                                                                                                                                           |                                                                                   |                    |        |            |            |                  |               |              |                 |                                                                                                                                                                                                                                                                                                                                                                                                                                                                                                                   |                                                                                                                                                                        |
| <b>Karlstad 2022<sup>4</sup>, Denmark, Finland, Norway, and Sweden, Retrospective population-based cohort, December 2020-October 2021</b> | General population, here data of 12-15 years are reported (++) received BNT162b2) | 21 days            | 1      | M          | MD         | IRR              | 4.77          | 1.85         | 12.26           | *Increased risk of myocarditis /pericarditis after both dose 1 and 2 of mRNA vaccine.<br>*For individuals receiving 2 doses of the same vaccine, risk of myocarditis highest among young males (aged 16-24 years) after dose 2.<br>*Findings compatible with between 4 and 7 excess events in 28 days per 100 000 vaccinees after BNT162b2, and between 9 and 28 excess events per 100 000 vaccinees after mRNA-1273.<br>*Risk to be balanced against the benefits of protecting against severe COVID-19 disease. |                                                                                                                                                                        |
|                                                                                                                                           |                                                                                   |                    | 2      | M          | MD         |                  | 13.86         | 5.78         | 33.22           |                                                                                                                                                                                                                                                                                                                                                                                                                                                                                                                   |                                                                                                                                                                        |

Abbreviation: M: male, F: female, MD: myocarditis, PD: pericarditis, M/P: myocarditis and pericarditis, RR: risk ratio, IRR: incidence rate ratio, ROR: reported odds ratio, RD: risk difference, C-VAM: coronavirus disease 2019 vaccination associated myocarditis, CMR: cardiovascular magnetic resonance



**Supplementary Table 2: Risk of bias of included studies assessed with ROBINS-I (domains 1-5)**

| Study                 | Bias due to confounding |                                                                                                                                                                                                                                                  | Bias in selection of participants |                                                                                                                                                                                                                                                                    | Bias in classification of interventions |                                                                                                                                                                                                                                                                                                          | Bias due to deviations from intended interventions |                                                                                                                                                                                        | Bias due to missing data |                                                                                                                                                                                                                                                                                       |
|-----------------------|-------------------------|--------------------------------------------------------------------------------------------------------------------------------------------------------------------------------------------------------------------------------------------------|-----------------------------------|--------------------------------------------------------------------------------------------------------------------------------------------------------------------------------------------------------------------------------------------------------------------|-----------------------------------------|----------------------------------------------------------------------------------------------------------------------------------------------------------------------------------------------------------------------------------------------------------------------------------------------------------|----------------------------------------------------|----------------------------------------------------------------------------------------------------------------------------------------------------------------------------------------|--------------------------|---------------------------------------------------------------------------------------------------------------------------------------------------------------------------------------------------------------------------------------------------------------------------------------|
|                       | Judgment                | Comment                                                                                                                                                                                                                                          | Judgment                          | Comment                                                                                                                                                                                                                                                            | Judgment                                | Comment                                                                                                                                                                                                                                                                                                  | Judgment                                           | Comment                                                                                                                                                                                | Judgment                 | Comment                                                                                                                                                                                                                                                                               |
| <b>Block 2022</b>     | Unclear                 | '...data were obtained using a query that returned aggregate data from sites, precluding adjustment for potential confounders.'<br>'Stratification by age and sex was performed because of their clear prior association with cardiac outcomes.' | Low                               | 'This study used EHR data from 40 health care systems participating in PCORnet, the National Patient-Centred Clinical Research Network...' to calculate incidences of cardiac outcomes. Cohort exclusions and index dates for cohort entrance appeared reasonable. | Unclear                                 | '...only...mRNA COVID-19 vaccinations documented in EHRs were available for assessment.'<br>'Under-ascertainment of...mRNA COVID-19 vaccinations reduced sample size and might have introduced bias if capture of...vaccination within the EHR occurred differentially for those with cardiac outcomes.' | Low                                                | Given the electronic health records this study is based on, it is unlikely that adolescents receiving or not receiving the vaccine would not have been classified as such.             | Unclear                  | Due to the passive surveillance conducted in this study, it is impossible to determine the number of adolescents who received the vaccine and who had myocarditis events that were not reported.<br>'...outcomes were rare in some cohorts, leading to wide CIs around RR estimates.' |
| <b>June Choe 2021</b> | High                    | Estimates were unadjusted because of the 'lack of demographic data for individual cases.                                                                                                                                                         | High                              | Adverse events following immunisation were recorded using passive surveillance, but it is not clear if these were linked to vaccination records in this cohort study.                                                                                              | Low                                     | Passive surveillance for adverse events following immunisation was conducted through the Korea Immunization Management System (KIMS).                                                                                                                                                                    | Low                                                | Given the electronic vaccination management system this study is based on, it is unlikely that students receiving or not receiving the vaccine would not have been classified as such. | Unclear                  | Due to the passive surveillance conducted in this study, it is impossible to determine the number of students who received the vaccine and who had myocarditis events that were not reported.                                                                                         |
| <b>Chouchana 2022</b> | Unclear                 | 'We performed the main analysis and a secondary analysis stratified according to age groups and sex.'<br>No other adjustment for confounding is reported.                                                                                        | Low                               | Data were captured as part of the VigiBase database of the WHO, a global database of individual case safety reports and linked to the COVID-19 Data Tracker for assessment of the                                                                                  | Low                                     | Vaccination status was linked to COVID-19 Data Tracker from the US Centres for Disease Control and Prevention.                                                                                                                                                                                           | Low                                                | Considering the observational nature of the study and inclusion of only those who had received the vaccine, this bias is unlikely to have been introduced.                             | Unclear                  | Due to the passive surveillance conducted in this study, it is impossible to determine the number of adolescents who received the vaccine and who had myocarditis events that were not reported.                                                                                      |

|                   |         |                                                                                                                                                                                                                                                                                            |     |                                                                                                                                                                                                                                                                                              |     |                                                                                                                                                                                  |     |                                                                                                                                                                                  |         |                                                                                                                                                                                                                                                                                     |
|-------------------|---------|--------------------------------------------------------------------------------------------------------------------------------------------------------------------------------------------------------------------------------------------------------------------------------------------|-----|----------------------------------------------------------------------------------------------------------------------------------------------------------------------------------------------------------------------------------------------------------------------------------------------|-----|----------------------------------------------------------------------------------------------------------------------------------------------------------------------------------|-----|----------------------------------------------------------------------------------------------------------------------------------------------------------------------------------|---------|-------------------------------------------------------------------------------------------------------------------------------------------------------------------------------------------------------------------------------------------------------------------------------------|
|                   |         |                                                                                                                                                                                                                                                                                            |     | number of people vaccinated in the US.                                                                                                                                                                                                                                                       |     |                                                                                                                                                                                  |     |                                                                                                                                                                                  |         | 'Spontaneous reports will likely feature under-reporting of total real-world cases as well as variable data quality, all of which are inherent to any pharmacovigilance system.'                                                                                                    |
| <b>Chua 2021</b>  | High    | No adjustment for confounding. Subgroup analyses were conducted by sex.                                                                                                                                                                                                                    | Low | 'All individuals receiving the Comirnaty vaccine have also consented to their vaccination records being linked to their corresponding comprehensive electronic health records held by the Hospital Authority (HA), the major publicly funded healthcare provider, through the CARE program.' | Low | Passive surveillance for adverse events following immunisation was conducted through the vaccination records of participants, provided by the Department of Health in Hong Kong. | Low | Given the electronic vaccination records this study is based on, it is unlikely that adolescents receiving or not receiving the vaccine would not have been classified as such   | Unclear | '...asymptomatic subjects and subjects with transient and subtle symptoms of acute myocarditis/pericarditis, such as tachycardia and mild chest discomfort, might not seek medical consultation or have sought medical consultation in the private sector which were not reported.' |
| <b>Dagan 2021</b> | Unclear | Results stratified by age and sex are reported. '...vaccinated persons and unvaccinated controls were exactly matched on a set of baseline variables that were deemed to be potential confounders according to domain expertise...'<br>'...persons in the study were not randomly assigned | Low | No bias in the selection of participants was observed, with all CHS members of relevant age included. The exception was a number of exclusions on methodological grounds (distinguishing true new events and minimising confounders from special populations) which were                     | Low | Misclassification of interventions is unlikely, given that vaccination status of patients was recorded in the electronic medical record of the insurer.                          | Low | Given the electronic medical record data this study is based on, it is unlikely that participants receiving or not receiving the vaccine would not have been classified as such. | Unclear | Due to the passive surveillance conducted in this study, it is impossible to determine the number of adolescents who received the vaccine and had unreported myocarditis events.                                                                                                    |

|                     |      |                                                                                                                                                                                                                                      |     |                                                                                                                                                                                           |         |                                                         |         |                                                                                                                                                                                                                                                                                                                                                                              |         |                                                                                                                                                                                                                                                                                                                                                                                                                                           |
|---------------------|------|--------------------------------------------------------------------------------------------------------------------------------------------------------------------------------------------------------------------------------------|-----|-------------------------------------------------------------------------------------------------------------------------------------------------------------------------------------------|---------|---------------------------------------------------------|---------|------------------------------------------------------------------------------------------------------------------------------------------------------------------------------------------------------------------------------------------------------------------------------------------------------------------------------------------------------------------------------|---------|-------------------------------------------------------------------------------------------------------------------------------------------------------------------------------------------------------------------------------------------------------------------------------------------------------------------------------------------------------------------------------------------------------------------------------------------|
|                     |      | according to exposures...this may have introduced confounding at baseline and selection bias at censoring, especially since a single set of confounders was used for adjustment in the assessment of many disparate adverse events.' |     | considered reasonable.                                                                                                                                                                    |         |                                                         |         |                                                                                                                                                                                                                                                                                                                                                                              |         |                                                                                                                                                                                                                                                                                                                                                                                                                                           |
| <b>Das 2021</b>     | High | No adjustment for potential confounders is reported.                                                                                                                                                                                 | Low | 'Children were included in the study if they presented with probable myopericarditis after mRNA COVID-19 vaccination between May 10, 2021, and June 20, 2021, and were aged 12-18 years.' | Unclear | It is not reported how vaccination status was verified. | Unclear | It is not clear how vaccination status was verified, therefore bias due to deviations from intended interventions could not be ruled out. 'Because the Pfizer-BioNTech (BNT162b2) vaccine is the only mRNA vaccine currently approved in individuals at 12-15 years of age, we have presumed that all patients received this vaccine (without verifying vaccination cards).' | Unclear | Due to the passive surveillance conducted in this study, it is impossible to determine the number of adolescents who received the vaccine and had unreported myocarditis events. '... although the patients who were symptomatic and sought medical care were evaluated and diagnosed, several COVID-19 vaccine-associated myocarditis episodes could be subclinical or have trivial symptoms that did not lead to seeking medical care.' |
| <b>Foltran 2022</b> | Low  | 'The logistic regression model performed for the disproportionality analysis was adjusted for five variables: age, sex, type of reporter, completeness of                                                                            | Low | Data were captured as part of the VigiBase database of the WHO, a global database of individual case safety reports with mRNA COVID-19 vaccines. 'All                                     | Unclear | It is not reported how vaccination status was verified. | Unclear | It is not clear how vaccination status was verified, therefore bias due to deviations from intended interventions could not be ruled out.                                                                                                                                                                                                                                    | Unclear | Due to the passive surveillance conducted in this study, it is impossible to determine the number of adolescents who received the vaccine and who had                                                                                                                                                                                                                                                                                     |

|                       |      |                                                                                                |     |                                                                                                                                                                                                                                              |         |                                                                               |         |                                                                                                                                                              |         |                                                                                                                                                                                                  |
|-----------------------|------|------------------------------------------------------------------------------------------------|-----|----------------------------------------------------------------------------------------------------------------------------------------------------------------------------------------------------------------------------------------------|---------|-------------------------------------------------------------------------------|---------|--------------------------------------------------------------------------------------------------------------------------------------------------------------|---------|--------------------------------------------------------------------------------------------------------------------------------------------------------------------------------------------------|
|                       |      | individual case safety reports, and number of coreported drugs when the headcount allowed it.' |     | adolescents (12–17 years) who received mRNA COVID-19 vaccines were included.'                                                                                                                                                                |         |                                                                               |         |                                                                                                                                                              |         | myocarditis events that were not reported.                                                                                                                                                       |
| <b>Funck 2022</b>     | High | No adjustment for potential confounders is reported.                                           | Low | 'Biologics Effectiveness and Safety (BEST) database and the Vaccine Safety Datalink (VSD) to monitor the incidence of myocarditis and pericarditis cases post-vaccination since EUA approval of the COVID-19 vaccines.'                      | Low     | Vaccination status was captured as part of the Vaccine Safety Datalink (VSD). | Low     | Considering the data modelling nature of the study and inclusion of only those who had received the vaccine, this bias is unlikely to have been introduced.  | Unclear | Due to the passive surveillance data used in this study, it is impossible to determine the number of adolescents who received the vaccine and who had myocarditis events that were not reported. |
| <b>Gurdasani 2021</b> | High | No adjustment for potential confounders is reported.                                           | Low | 'Patients were included in the analyses if they resided in England, were alive on the start date of the study period, registered with a primary care practice, had a valid pseudo-identifier for linkage and at least 28 days of follow-up.' | Unclear | It is not reported how vaccination status was verified.                       | Unclear | It is not clear how vaccination status was verified, therefore bias due to deviations from intended interventions could not be ruled out.                    | Unclear | Due to the passive surveillance conducted in this study, it is impossible to determine the number of adolescents who received the vaccine and who had myocarditis events that were not reported. |
| <b>Hause 2021</b>     | High | No adjustment for potential confounders is reported.                                           | Low | Data were captured as part of the Vaccine Adverse Event Reporting System (VAERS) for the COVID-19 vaccine.                                                                                                                                   | Low     | Vaccination status was linked to VAERS.                                       | Low     | Considering the observational nature of the study and recruitment of only those who had received the vaccine, this bias is unlikely to have been introduced. | Unclear | Due to the passive surveillance conducted in this study, it is impossible to determine the number of adolescents who received the vaccine and who had myocarditis events that were not reported. |

|                      |      |                                                                                                                                                                                                                              |     |                                                                                                                                                                                                                                                                                                                             |     |                                                                                                 |     |                                                                                                                                                                                 |         |                                                                                                                                                                                                                                                                    |
|----------------------|------|------------------------------------------------------------------------------------------------------------------------------------------------------------------------------------------------------------------------------|-----|-----------------------------------------------------------------------------------------------------------------------------------------------------------------------------------------------------------------------------------------------------------------------------------------------------------------------------|-----|-------------------------------------------------------------------------------------------------|-----|---------------------------------------------------------------------------------------------------------------------------------------------------------------------------------|---------|--------------------------------------------------------------------------------------------------------------------------------------------------------------------------------------------------------------------------------------------------------------------|
| <b>Hause 2022</b>    | Low  | The model on which the estimation of odds ratios is based adjusted for demographic variables and accounted for repeated measures among doses reported by each registrant.                                                    | Low | Data were captured as part of the Vaccine Adverse Event Reporting System (VAERS) for the COVID-19 vaccine.                                                                                                                                                                                                                  | Low | Vaccination status was linked to VAERS.                                                         | Low | Considering the observational nature of the study and recruitment of only those who had received the vaccine, this bias is unlikely to have been introduced.                    | Unclear | Due to the passive surveillance conducted in this study, it is impossible to determine the number of adolescents who received the vaccine and who had myocarditis events that were not reported.                                                                   |
| <b>Jain 2021</b>     | High | No adjustment for potential confounders is reported.                                                                                                                                                                         | Low | 'Patients $\leq 21$ years of age with a diagnosis of acute myocarditis based on clinical presentation, abnormal biomarkers, and/or cardiovascular imaging findings within 2 weeks of COVID-19 vaccination were included.' Exclusions related to myocarditis with plausible alternative aetiology was considered reasonable. | Low | Vaccination status was linked to VAERS.                                                         | Low | Considering the observational nature of the study and recruitment of only those who had received the vaccine, this bias is unlikely to have been introduced.                    | Unclear | Due to the passive surveillance conducted in this study, it is impossible to determine the number of adolescents who received the vaccine and who had myocarditis events that were not reported.                                                                   |
| <b>Karlstad 2022</b> | Low  | Poisson regression adjusting for the following: sex, age, calendar period, health care worker status, nursing home resident, and 5 comorbidities (pulmonary disease, kidney disease, autoimmune disease, cardiovascular dis- | Low | 'We included all persons who turned 12 years or older in 2021, were residents on January 1, 2017, and were alive and still residing within the country on December 27, 2020.' Exclusions for myocarditis cases prior to and until 26 December 2020 were                                                                     | Low | Vaccination status was checked using the nationwide health registers on SARS-CoV-2 vaccination. | Low | Given the electronic vaccination records this study is based on, it is unlikely that adolescents receiving or not receiving the vaccine would not have been classified as such. | Unclear | Due to the passive surveillance conducted in this study, it is impossible to determine the number of adolescents who received the vaccine and who had myocarditis events that were not reported, even though near-complete follow-up in these countries are noted. |

|                      |         |                                                                                                                                                                                                                                                       |     |                                                                                                                                                                                                                          |         |                                                                                                |         |                                                                                                                                                                                 |         |                                                                                                                                                                                                  |
|----------------------|---------|-------------------------------------------------------------------------------------------------------------------------------------------------------------------------------------------------------------------------------------------------------|-----|--------------------------------------------------------------------------------------------------------------------------------------------------------------------------------------------------------------------------|---------|------------------------------------------------------------------------------------------------|---------|---------------------------------------------------------------------------------------------------------------------------------------------------------------------------------|---------|--------------------------------------------------------------------------------------------------------------------------------------------------------------------------------------------------|
|                      |         | ease or diabetes, and cancer) defined by diagnoses before the start of follow-up.                                                                                                                                                                     |     | considered reasonable.                                                                                                                                                                                                   |         |                                                                                                |         |                                                                                                                                                                                 |         |                                                                                                                                                                                                  |
| <b>Krug 2021</b>     | High    | No adjustment for potential confounders is reported. Analyses were stratified by age, sex, prior infection history, variant, and medical comorbidity status.                                                                                          | Low | '...reports processed from 1 January 2021 to 18 June 2021 with symptom codes for 'myocarditis', 'pericarditis', 'myopericarditis' or 'chest pain' for children aged 12–17 years.' Exclusions were considered reasonable. | Low     | Vaccination status was linked to VAERS.                                                        | Low     | Considering the observational nature of the study and recruitment of only those who had received the vaccine, this bias is unlikely to have been introduced.                    | Unclear | Due to the passive surveillance conducted in this study, it is impossible to determine the number of adolescents who received the vaccine and who had myocarditis events that were not reported. |
| <b>Lai 2022</b>      | Unclear | Poisson regression models were used to generate age- and sex-adjusted incidence rate ratios. All demographic characteristics were not adjusted for in the model estimating incidence rate ratios, residual confounding cannot be completely excluded. | Low | Vaccination records and linked health records of adolescents were provided by the Department of Health.                                                                                                                  | Low     | Vaccination status was checked using an electronic database system.                            | Low     | Given the electronic vaccination records this study is based on, it is unlikely that adolescents receiving or not receiving the vaccine would not have been classified as such. | Low     | Retrospective cohort study with a very short follow-up of 28 days. Likelihood of missing critical clinical information is minimal.                                                               |
| <b>Li 2022</b>       | High    | No adjustment for potential confounders is reported.                                                                                                                                                                                                  | Low | Vaccination records and linked electronic health records of adolescents. The exclusion of adolescents with a history of myocarditis was considered reasonable.                                                           | Unclear | Vaccination status was checked using vaccination records. No further information is available. | Unclear | Vaccination status was determined through vaccination records. Bias due to deviations from intended interventions could not be ruled out.                                       | Unclear | Due to the passive surveillance conducted in this study, it is impossible to determine the number of adolescents who received the vaccine and who had myocarditis events that were not reported. |
| <b>Mevorach 2022</b> | High    | No adjustment for potential confounders is                                                                                                                                                                                                            | Low | 'During the period under study, 404,407 adolescents (195,579 of whom were male)                                                                                                                                          | Unclear | It is not reported how vaccination status was verified.                                        | Unclear | It is not clear how vaccination status was verified, therefore bias due to                                                                                                      | Unclear | Due to the passive surveillance conducted in this study, it is impossible to determine                                                                                                           |

|                     |      |                                                                                                                                                                |     |                                                                                                                                                                                                                                                                     |     |                                                    |     |                                                                                                                                                              |         |                                                                                                                                                                                                                                                                                          |
|---------------------|------|----------------------------------------------------------------------------------------------------------------------------------------------------------------|-----|---------------------------------------------------------------------------------------------------------------------------------------------------------------------------------------------------------------------------------------------------------------------|-----|----------------------------------------------------|-----|--------------------------------------------------------------------------------------------------------------------------------------------------------------|---------|------------------------------------------------------------------------------------------------------------------------------------------------------------------------------------------------------------------------------------------------------------------------------------------|
|                     |      | reported. Results are stratified by sex.                                                                                                                       |     | received the first dose of vaccine, 326,463 adolescents (157,153 of whom were male) received the second dose, and 18 cases of myocarditis leading to hospitalization were reported.' Exclusions due to reasonable alternative diagnoses were considered reasonable. |     |                                                    |     | deviations from intended interventions could not be ruled out.                                                                                               |         | the number of adolescents who received the vaccine and who had myocarditis events that were not reported. '...we acquired only reports of cases of myocarditis that led to hospitalization.'                                                                                             |
| <b>Nygaard 2022</b> | High | No adjustment for potential confounders is reported. Results are stratified by sex.                                                                            | Low | '...all individuals 12–17 years of age hospitalized due to myocarditis and pericarditis after COVID-19 mRNA vaccination in the period May 15 to September 15, 2021. The setting was a multicentre study including all 18 Danish Paediatric Departments...'          | Low | Vaccination status was linked to the Danish VAERS. | Low | Considering the observational nature of the study and recruitment of only those who had received the vaccine, this bias is unlikely to have been introduced. | Unclear | Due to the passive surveillance conducted in this study, it is impossible to determine the number of adolescents who received the vaccine and who had myocarditis events that were not reported. '...underreporting is one of the main limitations of this passive surveillance system.' |
| <b>Oster 2022</b>   | High | No adjustment for potential confounders is reported. Results are reported by race and ethnicity, where available. Age- and sex-specific rates were calculated. | Low | '...myocarditis to the Vaccine Adverse Event Reporting System (VAERS) that occurred after mRNA-based COVID-19 vaccine administration...'. Exclusions of cases with previous myocarditis were considered reasonable.                                                 | Low | Vaccination status was linked to VAERS.            | Low | Considering the observational nature of the study and recruitment of only those who had received the vaccine, this bias is unlikely to have been introduced. | Unclear | Due to the passive surveillance conducted in this study, it is impossible to determine the number of adolescents who received the vaccine and who had myocarditis events that were not reported. 'As such, the reports of myocarditis to VAERS may be incomplete, and                    |

|                 |      |                                                                                           |     |                                                                                                                                                                                    |     |                                                                                                        |     |                                                                                                                                                              |         |                                                                                                                                                                                                  |
|-----------------|------|-------------------------------------------------------------------------------------------|-----|------------------------------------------------------------------------------------------------------------------------------------------------------------------------------------|-----|--------------------------------------------------------------------------------------------------------|-----|--------------------------------------------------------------------------------------------------------------------------------------------------------------|---------|--------------------------------------------------------------------------------------------------------------------------------------------------------------------------------------------------|
|                 |      |                                                                                           |     |                                                                                                                                                                                    |     |                                                                                                        |     |                                                                                                                                                              |         | the quality of the information reported is variable.' 'No assumptions or imputations were made regarding missing data.'                                                                          |
| <b>Yap 2022</b> | High | No adjustment for potential confounders is reported. Results are reported by age and sex. | Low | 'Confirmed and probable cases based on the above definition were included. This study is a retrospective review of HAS vaccine adverse event reporting system up to 25 July 2021.' | Low | Vaccination status was linked to the Health Sciences Authority vaccine adverse event reporting system. | Low | Considering the observational nature of the study and recruitment of only those who had received the vaccine, this bias is unlikely to have been introduced. | Unclear | Due to the passive surveillance conducted in this study, it is impossible to determine the number of adolescents who received the vaccine and who had myocarditis events that were not reported. |



**Supplementary Table 3: Risk of bias of included studies assessed with ROBINS-I (domains 6-9)**

| Study                 | Bias in measurement of outcomes |                                                                                                                                                                                                                                                                      | Bias in selection of the reported result |                                                                                              | Other source of bias |                                                                                                                                                                                                                                                                                                                                               | Overall bias |                                                                                                                                                                                                                                            |
|-----------------------|---------------------------------|----------------------------------------------------------------------------------------------------------------------------------------------------------------------------------------------------------------------------------------------------------------------|------------------------------------------|----------------------------------------------------------------------------------------------|----------------------|-----------------------------------------------------------------------------------------------------------------------------------------------------------------------------------------------------------------------------------------------------------------------------------------------------------------------------------------------|--------------|--------------------------------------------------------------------------------------------------------------------------------------------------------------------------------------------------------------------------------------------|
|                       | Judgment                        | Comment                                                                                                                                                                                                                                                              | Judgment                                 | Comment                                                                                      | Judgment             | Comment                                                                                                                                                                                                                                                                                                                                       | Judgment     | Comment                                                                                                                                                                                                                                    |
| <b>Block 2022</b>     | High                            | '...case definitions for myocarditis, pericarditis, or MIS were ICD-10-CM code-based; diagnoses were not confirmed with chart review and are subject to misclassification.'                                                                                          | Unclear                                  | We did not have access to the protocol, therefore selective reporting could not be assessed. | Unclear              | '...outcomes were rare in some cohorts, leading to wide CIs around RR estimates.'<br>'...some overlap might have occurred in risk windows for persons who had a SARS-CoV-2 infection soon after vaccination or a vaccination soon after infection.' It is not clear how generalisable results from the PCORnet cohorts are to other settings. | High         | Measurement of outcomes was subject to misclassification. Confounding, intervention misclassification, attrition, selective outcome reporting, threats to external validity and imprecision due to rare outcomes could not be ruled out.   |
| <b>June Choe 2021</b> | Unclear                         | Some self-reporting of adverse events; the influence of self-reporting bias could not be quantified. 'Anyone, including vaccine recipients and health care providers, were encouraged to report a suspected adverse event following immunization to the government.' | Unclear                                  | We did not have access to the protocol, therefore selective reporting could not be assessed. | Unclear              | The sample is restricted to Korean high school students; therefore, the results may be limited in their generalisability.                                                                                                                                                                                                                     | High         | Data were unadjusted and therefore subject to confounding. Passive surveillance likely resulted in selection and attrition bias. Self-reporting bias, selective outcome reporting and threats to external validity could not be ruled out. |
| <b>Chouchana 2022</b> | Unclear                         | 'Another limitation is the quality of the data reported in pharmacovigilance databases, that could result in some cases in misdiagnosis.' 'On one hand, myocarditis has suffered from a notoriety bias after media communication.'                                   | Unclear                                  | We did not have access to the protocol, therefore selective reporting could not be assessed. | Low                  | None identified.                                                                                                                                                                                                                                                                                                                              | Unclear      | Confounding, attrition, ascertainment of outcomes and selective outcome reporting could not be ruled out.                                                                                                                                  |
| <b>Chua 2021</b>      | Unclear                         | 'Some patients had negative MRI results because not all MRI suites in Hong Kong's public                                                                                                                                                                             | Unclear                                  | We did not have access to the protocol, therefore selective reporting could not be assessed. | Unclear              | The sample is restricted to adolescent in Hong Kong; therefore, the results may be limited in their generalisability.                                                                                                                                                                                                                         | High         | Data were unadjusted and therefore subject to confounding. Attrition, ascertainment of outcomes, selective outcome reporting                                                                                                               |

|                   |         |                                                                                                                                                                                                                                                                                                                                                                                                                                                                                                                           |         |                                                                                              |         |                                                                                                                                                                                                                                                                                                                                                                                                                                                                                                                                                                                                   |         |                                                                                                                                         |
|-------------------|---------|---------------------------------------------------------------------------------------------------------------------------------------------------------------------------------------------------------------------------------------------------------------------------------------------------------------------------------------------------------------------------------------------------------------------------------------------------------------------------------------------------------------------------|---------|----------------------------------------------------------------------------------------------|---------|---------------------------------------------------------------------------------------------------------------------------------------------------------------------------------------------------------------------------------------------------------------------------------------------------------------------------------------------------------------------------------------------------------------------------------------------------------------------------------------------------------------------------------------------------------------------------------------------------|---------|-----------------------------------------------------------------------------------------------------------------------------------------|
|                   |         | hospitals have the capability...to meet the 2018 Lake Louise Criteria for the diagnosis of myocarditis. Furthermore, the incidence of acute myocarditis/ pericarditis following the COVID-19 vaccination remained to be high, possibly attributed to increased awareness...'<br>'...different criteria were likely used by clinicians in generating a diagnostic code among the nonvaccinated individuals for the calculation of the background myocarditis/ pericarditis incidence as it was in a non-research setting.' |         |                                                                                              |         |                                                                                                                                                                                                                                                                                                                                                                                                                                                                                                                                                                                                   |         | and threats to external validity could not be ruled out.                                                                                |
| <b>Dagan 2021</b> | Unclear | '...some diagnoses that were recorded in out-of-network hospitals, which were delayed in being reported to the insurer and were not entered by the person's general practitioner from the hospital discharge notes into the outpatient medical record, could have been missed. Fourth, it is possible that persons are more likely to increase their levels of clinical awareness, concern, or both after vaccination or SARS-CoV-2 infection...'                                                                         | Unclear | We did not have access to the protocol, therefore selective reporting could not be assessed. | Unclear | Generalisability is limited due to the inclusion of only participants with health insurance within Clalit Health Services. 'Because this different composition changes the population over which the causal effect is being estimated, different estimates might be found for adverse events for which the incidence may differ substantially between subgroups (e.g., myocarditis). Also, we excluded certain populations...that could be at particularly high risk for certain adverse events. Both issues should be taken into account when considering the generalizability of the findings.' | Unclear | Confounding, attrition, ascertainment of outcomes, selective outcome reporting and threats to external validity could not be ruled out. |
| <b>Das 2021</b>   | Low     | Physician-assessed '...probable myopericarditis as per the CDC-defined criteria for                                                                                                                                                                                                                                                                                                                                                                                                                                       | Unclear | We did not have access to the protocol, therefore selective                                  | Unclear | Generalisability is limited by the small number of participants from the US only.                                                                                                                                                                                                                                                                                                                                                                                                                                                                                                                 | High    | Data were unadjusted and therefore subject to confounding. Bias in                                                                      |

|                       |         |                                                                                                                                                                                                                                                                                                                                                                                                                    |         |                                                                                              |         |                                                                                                                                                                                                                                                                                                                                                                                                                                                                                                                                                                             |         |                                                                                                                                                                                                                                                                                      |
|-----------------------|---------|--------------------------------------------------------------------------------------------------------------------------------------------------------------------------------------------------------------------------------------------------------------------------------------------------------------------------------------------------------------------------------------------------------------------|---------|----------------------------------------------------------------------------------------------|---------|-----------------------------------------------------------------------------------------------------------------------------------------------------------------------------------------------------------------------------------------------------------------------------------------------------------------------------------------------------------------------------------------------------------------------------------------------------------------------------------------------------------------------------------------------------------------------------|---------|--------------------------------------------------------------------------------------------------------------------------------------------------------------------------------------------------------------------------------------------------------------------------------------|
|                       |         | diagnosis of myocarditis and pericarditis.’                                                                                                                                                                                                                                                                                                                                                                        |         | reporting could not be assessed.                                                             |         |                                                                                                                                                                                                                                                                                                                                                                                                                                                                                                                                                                             |         | classification of the intervention and due to deviations from intended interventions, attrition, selective outcome reporting and threats to external validity could not be ruled out.                                                                                                |
| <b>Foltran 2022</b>   | Unclear | It is not reported how myocarditis was defined and assessed in various countries.                                                                                                                                                                                                                                                                                                                                  | Unclear | We did not have access to the protocol, therefore selective reporting could not be assessed. | Unclear | ‘As the US pharmacovigilance data did not include dose information (dose 1 or dose 2), we were unable to analyse the reports. This lack of information is a potential limitation of our study on the transferability of the results to the US vaccination context and may have limited the statistical power of our study, particularly when comparing the two vaccines.’                                                                                                                                                                                                   | Unclear | Bias in classification of the intervention and due to deviations from intended interventions, attrition, bias related to ascertainment of outcomes, selective outcome reporting and limitations of generalisability to the US context could not be ruled out.                        |
| <b>Funck 2022</b>     | Unclear | ‘Optum is a health claims database in FDA’s CBER BEST System which has inherent limitations, such as small sample sizes and imperfect sensitivity of ICD-10 codes to identify these rare outcomes. We also acknowledge that the cases were not validated by a complete review of patient’s medical records. The lack of chart review validation may lead to overestimation of myocarditis/pericarditis case rate.’ | Unclear | We did not have access to the protocol, therefore selective reporting could not be assessed. | Unclear | ‘Our analysis was conducted before the emergence of the Omicron variant. The estimated benefits of the vaccine would decrease if the vaccine became less effective against novel variants of COVID-19, but benefit would increase if COVID-19 incidence increased. The durability of vaccine protection is another source of uncertainty for the model.’ ‘...VSD has a smaller database than the BEST system and its generalizability is limited to patients who have health maintenance organization (HMO) insurance with a high emphasis on wellness/ preventative care.’ | High    | There is a high risk of bias due to potential confounding. Attrition, bias related to ascertainment of outcomes, selective outcome reporting, threats to external validity of some data sources and limitations in the evidence base for variants of concern could not be ruled out. |
| <b>Gurdasani 2021</b> | Unclear | It is not reported how myocarditis was defined and assessed in various settings.                                                                                                                                                                                                                                                                                                                                   | Unclear | We did not have access to the protocol, therefore selective reporting could not be assessed. | Unclear | ‘We do not assess risks separately for one dose and two doses of vaccines...’                                                                                                                                                                                                                                                                                                                                                                                                                                                                                               | High    | Data were unadjusted and therefore subject to confounding. Bias in classification of the intervention and due to                                                                                                                                                                     |

|                   |         |                                                                                                                                                                                                                                                                                                                                                                                                                                                                                                                                                                                                                                                                                                     |         |                                                                                              |         |                                                                                                                                                                                                                                                                                                                                                                                                                         |         |                                                                                                                                                                                           |
|-------------------|---------|-----------------------------------------------------------------------------------------------------------------------------------------------------------------------------------------------------------------------------------------------------------------------------------------------------------------------------------------------------------------------------------------------------------------------------------------------------------------------------------------------------------------------------------------------------------------------------------------------------------------------------------------------------------------------------------------------------|---------|----------------------------------------------------------------------------------------------|---------|-------------------------------------------------------------------------------------------------------------------------------------------------------------------------------------------------------------------------------------------------------------------------------------------------------------------------------------------------------------------------------------------------------------------------|---------|-------------------------------------------------------------------------------------------------------------------------------------------------------------------------------------------|
|                   |         |                                                                                                                                                                                                                                                                                                                                                                                                                                                                                                                                                                                                                                                                                                     |         |                                                                                              |         |                                                                                                                                                                                                                                                                                                                                                                                                                         |         | deviations from intended interventions, attrition, bias in measurement of outcomes, selective outcome reporting and uncertainty around the effect of single doses could not be ruled out. |
| <b>Hause 2021</b> | Unclear | The authors report that ‘...VAERS is a passive surveillance system and is subject to underreporting and reporting biases...health care providers are required to report all serious events following vaccination. Second, medical review of reported deaths following vaccination is dependent on availability of medical records, death certificates, and autopsy reports, which might be unavailable or not available in a timely manner. Third, lack of a statistical safety signal in planned monitoring does not preclude a safety concern... Fourth, this study was not designed to identify all cases of myocarditis; only reports that listed the MedDRA term “myocarditis” were included.’ | Unclear | We did not have access to the protocol, therefore selective reporting could not be assessed. | Unclear | ‘...v-safe is a voluntary self-enrolment program that requires children aged <15 years be enrolled by a parent or guardian and relies on vaccine administrators to promote the program. Therefore, v-safe data might not be generalizable to the overall vaccinated adolescent population.’ Given the heterogeneous composition of the American population, generalisability with regards to ethnicity is less limited. | High    | There is a high risk of bias due to potential confounding. Attrition and ascertainment biases, selection bias and limitations to generalisability could also not be ruled out.            |
| <b>Hause 2022</b> | Unclear | ‘...as a passive surveillance system, VAERS is subject to reporting biases and underreporting, especially of nonserious events.’ ‘...it is possible that vaccinees who experience an adverse event could be more likely to                                                                                                                                                                                                                                                                                                                                                                                                                                                                          | Unclear | We did not have access to the protocol, therefore selective reporting could not be assessed. | Unclear | ‘...v-safe is a voluntary program; therefore, data might not be representative of the vaccinated population.’ Given the heterogeneous composition of the American population, generalisability with regards to ethnicity is less limited.                                                                                                                                                                               | Unclear | Attrition and ascertainment biases, selection bias and limitations to generalisability could not be ruled out. Myocarditis counts are subject to change.                                  |

|                      |         |                                                                                                                                                                                                                                                                                                                                                                 |         |                                                                                              |         |                                                                                                                                                                                                                                                                                                                                                                                    |         |                                                                                                                                                                                                                                                                    |
|----------------------|---------|-----------------------------------------------------------------------------------------------------------------------------------------------------------------------------------------------------------------------------------------------------------------------------------------------------------------------------------------------------------------|---------|----------------------------------------------------------------------------------------------|---------|------------------------------------------------------------------------------------------------------------------------------------------------------------------------------------------------------------------------------------------------------------------------------------------------------------------------------------------------------------------------------------|---------|--------------------------------------------------------------------------------------------------------------------------------------------------------------------------------------------------------------------------------------------------------------------|
|                      |         | respond to v-safe surveys...<br>Finally,<br>assessment of myocarditis<br>reports to VAERS is ongoing,<br>and counts are subject to<br>change.'                                                                                                                                                                                                                  |         |                                                                                              |         |                                                                                                                                                                                                                                                                                                                                                                                    |         |                                                                                                                                                                                                                                                                    |
| <b>Jain 2021</b>     | Unclear | 'The 2009 Lake Louise criteria or, when parametric mapping was available, the 2018 revised Lake Louise CMR criteria were used to test for a diagnosis of acute myocarditis. '<br>'...combining patients from 16 different institutions that used similar but not identical approaches during the workup and management of childhood myocarditis.'               | Unclear | We did not have access to the protocol, therefore selective reporting could not be assessed. | Unclear | 'Our patients represent a selected cohort that may not necessarily be representative of the general paediatric population.'                                                                                                                                                                                                                                                        | High    | There is a high risk of bias due to potential confounding. Attrition, bias in measurement of the outcomes, selective outcome reporting and threats to external validity could not be ruled out.                                                                    |
| <b>Karlstad 2022</b> | Unclear | Outcomes are explicitly defined in eTable 2. '...without access to data on clinical measures, such as troponin levels, diagnostic imaging results, and endomyocardial biopsy, we studied myocarditis as diagnosed in clinical practice and could therefore not assess how many of these patients fulfilled all criteria for receiving a myocarditis diagnosis.' | Unclear | We did not have access to the protocol, therefore selective reporting could not be assessed. | Unclear | 'Our findings in children aged 12 to 15 years were limited to relatively few exposed individuals because vaccination in this age group only recently started in most countries.'<br>'Surveillance bias, whereby increased focus and media attention on myocarditis as an adverse event after vaccination resulted in more subclinical cases being diagnosed, cannot be ruled out.' | Unclear | Attrition, bias in the measurement of outcomes, selective outcome reporting, limitations of sample size and surveillance bias could not be ruled out                                                                                                               |
| <b>Krug 2021</b>     | Low     | 'Reports were required to meet the CDC working definition for probable acute myocarditis...' 'A concern about a passive reporting system such as VAERS is the risk of over-ascertainment. To address this concern, we aligned our inclusion criteria with the                                                                                                   | Unclear | We did not have access to the protocol, therefore selective reporting could not be assessed. | Unclear | 'In our sample, approximately 15% of cases had an unknown dose number, similar to the CDC's reports. We allocated these cases using the proportion of reports with known dose number.' 'Our analysis only describes rates associated with the Pfizer-BioNTech vaccine.'<br>'Our sample only includes 23                                                                            | High    | There is a high risk of bias due to potential confounding. Attrition, selective outcome reporting, uncertainty regarding the effect of number of doses and limitations related to generalisability for type of vaccine and events in girls could not be ruled out. |

|                      |         |                                                                                                                                                                                                                                                                                                                                                                                                                                                 |         |                                                                                              |         |                                                                                                                                                                                                                                                                                        |         |                                                                                                                                                                                                                                                                                                                                  |
|----------------------|---------|-------------------------------------------------------------------------------------------------------------------------------------------------------------------------------------------------------------------------------------------------------------------------------------------------------------------------------------------------------------------------------------------------------------------------------------------------|---------|----------------------------------------------------------------------------------------------|---------|----------------------------------------------------------------------------------------------------------------------------------------------------------------------------------------------------------------------------------------------------------------------------------------|---------|----------------------------------------------------------------------------------------------------------------------------------------------------------------------------------------------------------------------------------------------------------------------------------------------------------------------------------|
|                      |         | CDC's case definition...'                                                                                                                                                                                                                                                                                                                                                                                                                       |         |                                                                                              |         | cases in girls, which is a limitation of this data set...'                                                                                                                                                                                                                             |         |                                                                                                                                                                                                                                                                                                                                  |
| <b>Lai 2022</b>      | Low     | Objective measurement was used from the list of 30 AEFIs using the International Classification of Diseases, Ninth Revision (ICD-9) and International Classification of Primary Care (ICPC).                                                                                                                                                                                                                                                    | Unclear | We did not have access to the protocol, therefore selective reporting could not be assessed. | Unclear | The authors acknowledge that adolescents may have sought medical care for AEs in the private sector, therefore some AEs may not have been detected. Diagnostic codes were used as proxies for disease. The study population is predominantly Chinese, and generalisability is unclear. | Unclear | Residual confounding and selective outcome reporting could not be ruled out. Some outcomes may have been missed due to the way in which participants sought care; this is expected to affect vaccinated and unvaccinated participants equally. Some misclassification is possible, and generalisability may be limited.          |
| <b>Li 2022</b>       | Low     | '...inpatient myocarditis cases were identified using the International Classification of Diseases, Ninth Revision, Clinical Modification.'                                                                                                                                                                                                                                                                                                     | Unclear | We did not have access to the protocol, therefore selective reporting could not be assessed. | Unclear | 'Limitations include sample size during the post policy period.' Generalisability is limited to adolescents in Hong Kong, and data were generated before the arrival of the Omicron variant.                                                                                           | High    | Data were unadjusted and therefore subject to confounding. Bias in classification of the intervention and due to deviations from intended interventions, attrition, selective outcome reporting, sample size limitations, threats to external validity and a lack of information for the Omicron variant could not be ruled out. |
| <b>Mevorach 2022</b> | Unclear | 'Clinical data that involved International Classification of Diseases, 10th Revision, 422.0-9x and 429.0x codes were reviewed by a cardiologist and a rheumatologist, and the severity of disease was classified according to the Brighton Collaboration Case Definition for myocarditis.'<br>'Limitations of the current study are that myocarditis was not validated on myocardial biopsy, that misclassification and reporting bias may have | Unclear | We did not have access to the protocol, therefore selective reporting could not be assessed. | Low     | None identified.                                                                                                                                                                                                                                                                       | High    | Data were unadjusted and therefore subject to confounding. Bias in classification of the intervention and due to deviations from intended interventions, attrition, bias in measurement of outcomes and selective outcome reporting could not be ruled out.                                                                      |

|                     |         |                                                                                                                                                                                                                                                                                                                                                                                               |         |                                                                                              |         |                                                                                                                                                        |      |                                                                                                                                                                                                                   |
|---------------------|---------|-----------------------------------------------------------------------------------------------------------------------------------------------------------------------------------------------------------------------------------------------------------------------------------------------------------------------------------------------------------------------------------------------|---------|----------------------------------------------------------------------------------------------|---------|--------------------------------------------------------------------------------------------------------------------------------------------------------|------|-------------------------------------------------------------------------------------------------------------------------------------------------------------------------------------------------------------------|
|                     |         | taken place...'                                                                                                                                                                                                                                                                                                                                                                               |         |                                                                                              |         |                                                                                                                                                        |      |                                                                                                                                                                                                                   |
| <b>Nygaard 2022</b> | Unclear | 'Further, our incidences may be overestimated due to possible inclusion of cases unrelated to the vaccine, but occurring in vaccinated adolescents...On the contrary, our incidences may also be underestimated.'                                                                                                                                                                             | Unclear | We did not have access to the protocol, therefore selective reporting could not be assessed. | Low     | None identified.                                                                                                                                       | High | Data were unadjusted and therefore subject to confounding. Attrition, bias in measurement of outcomes and selective outcome reporting could not be ruled out.                                                     |
| <b>Oster 2022</b>   | Unclear | 'Furthermore, as a passive system, VAERS data are subject to reporting biases in that both underreporting and overreporting are possible. Given the high verification rate of reports of myocarditis to VAERS after mRNA-based COVID-19 vaccination, underreporting is more likely. Therefore, the actual rates of myocarditis per million doses of vaccine is likely higher than estimated.' | Unclear | We did not have access to the protocol, therefore selective reporting could not be assessed. | Unclear | '...the data from vaccination administration were limited to what is reported to the CDC and thus may be incomplete, particularly about demographics.' | High | Data were unadjusted and therefore subject to confounding. Attrition, bias in measurement of outcomes, selective outcome reporting and limitations around vaccination administration data could not be ruled out. |
| <b>Yap 2022</b>     | Low     | 'Reports of myocarditis and pericarditis are reviewed and adjudicated using the US Centres for Disease Control and Prevention (CDC) definition of myocarditis and pericarditis by an independent expert panel of cardiologists.'                                                                                                                                                              | Unclear | We did not have access to the protocol, therefore selective reporting could not be assessed. | Low     | None identified.                                                                                                                                       | High | Data were unadjusted and therefore subject to confounding. Attrition and selective outcome reporting could not be ruled out.                                                                                      |





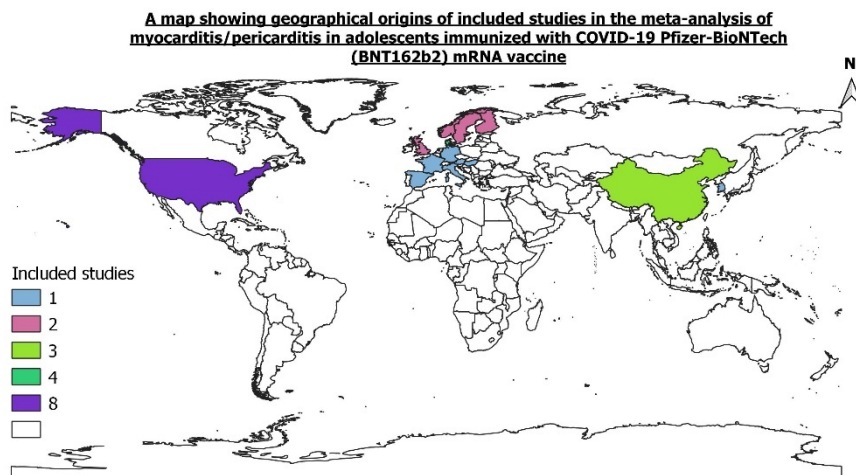

**Supplementary Figure 1: Map showing geographical origins of included studies**

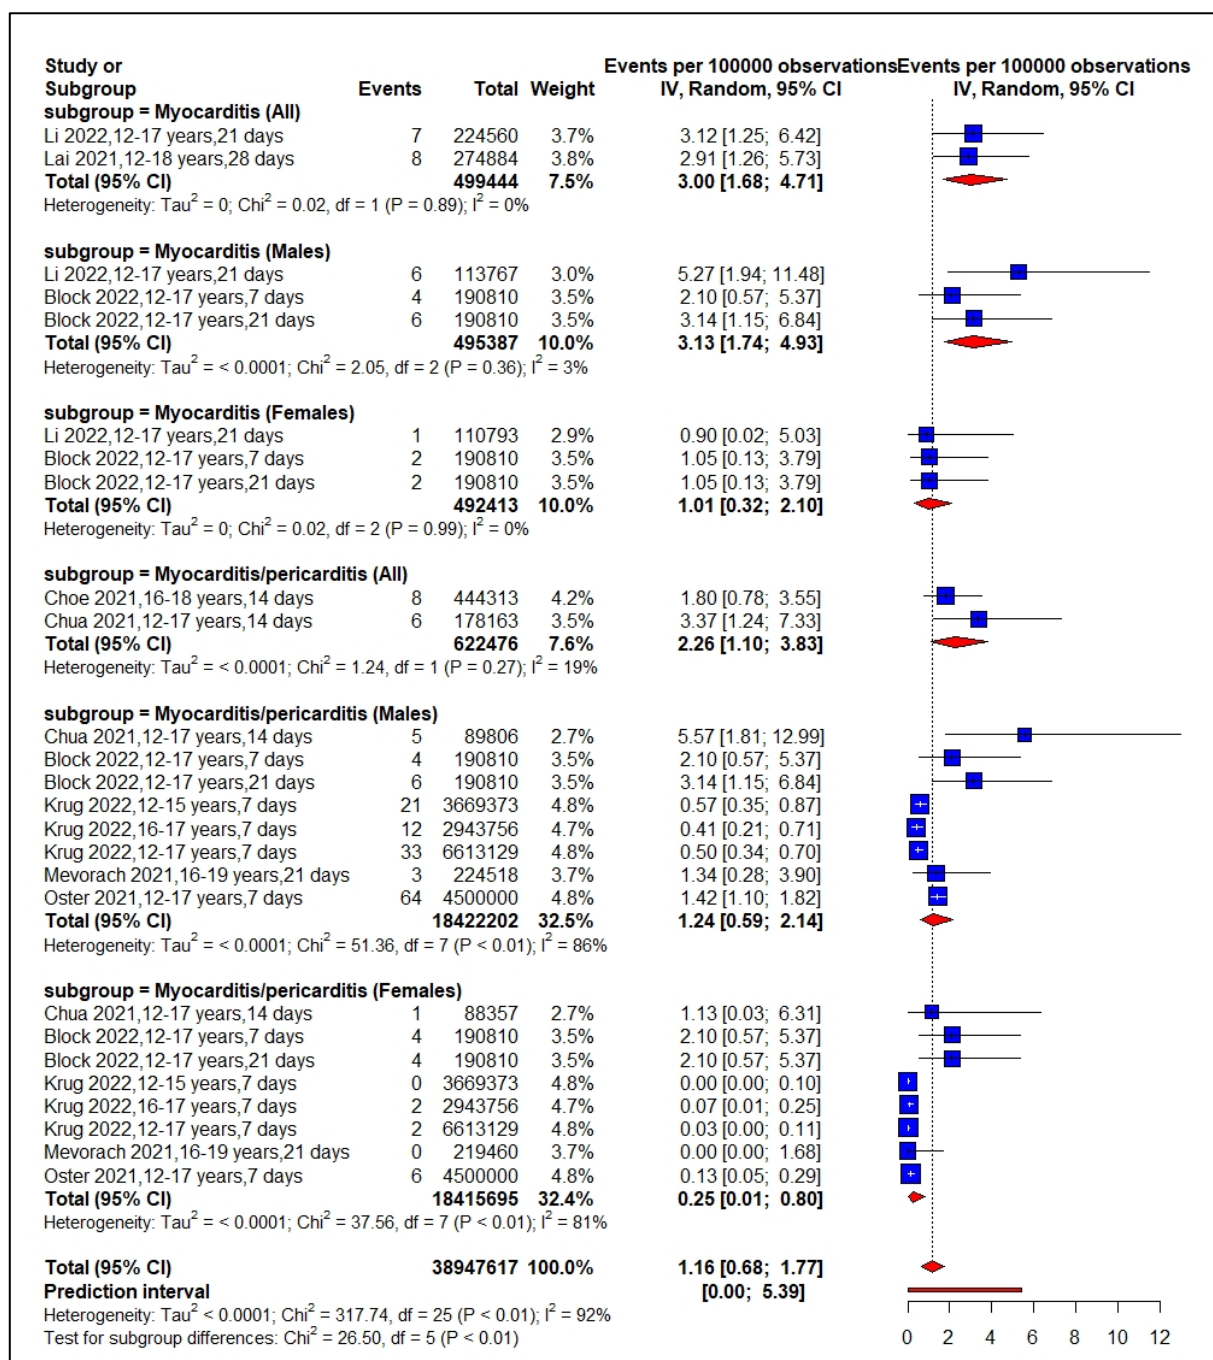

**Supplementary Figure 2: Pooled proportion of myocarditis or of myocarditis/pericarditis following the first dose of BNT162b2 vaccination against COVID-19 among adolescents.** Subgroup are presented to consider sex. The pooled incidence of studied inflammatory heart conditions following the first dose was 1.16 cases per 100,000 doses of BNT162b2 vaccine. The whisker represents the 95% confidence interval. The inclusion period of participants spanned from December 2020 to February 2022. Days indicate the period length after BNT162b2 vaccination used by the study. E.g.: 7 days will read as 0-7 days post BNT162b2 vaccination.

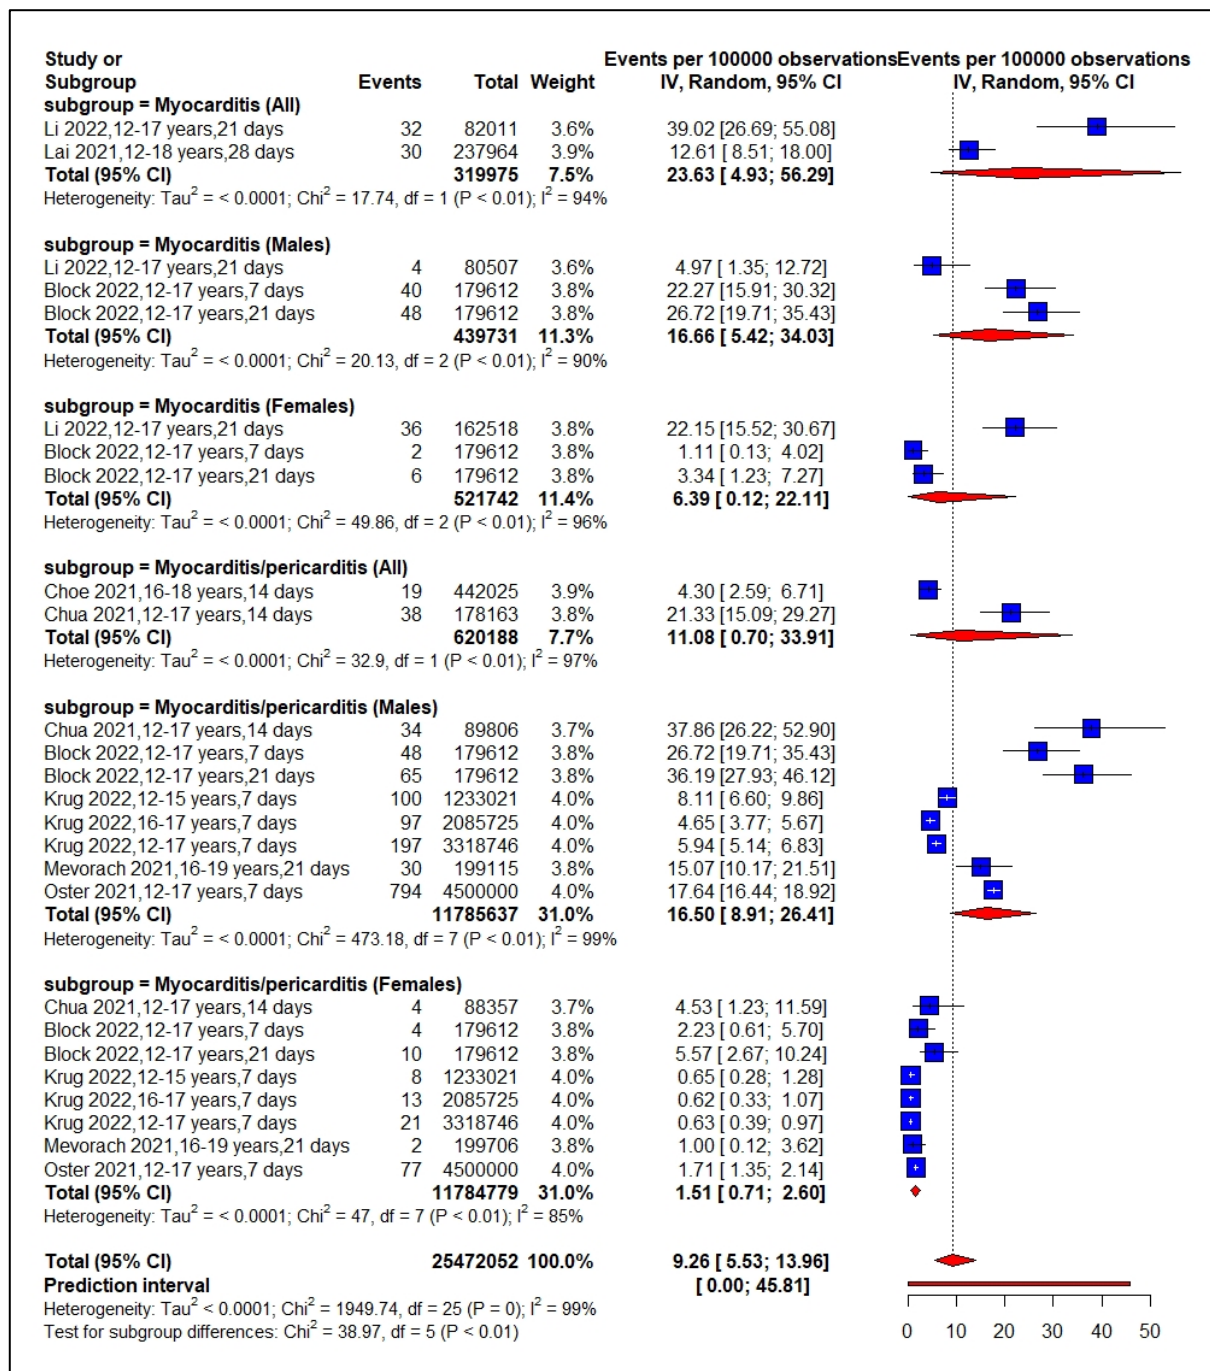

**Supplementary Figure 3: Pooled proportion of myocarditis or of myocarditis/pericarditis following the second dose of BNT162b2 vaccination against COVID-19 among adolescents.** Subgroup are presented to consider sex. The pooled incidence of studied inflammatory heart conditions following the second dose was 9.26 cases per 100,000 doses of BNT162b2 vaccine. The whisker represents the 95% confidence interval. The inclusion period of participants spanned from December 2020 to February 2022. Days indicate the period length after BNT162b2 vaccination used by the study. E.g.: 7 days will read as 0-7 days post BNT162b2 vaccination.

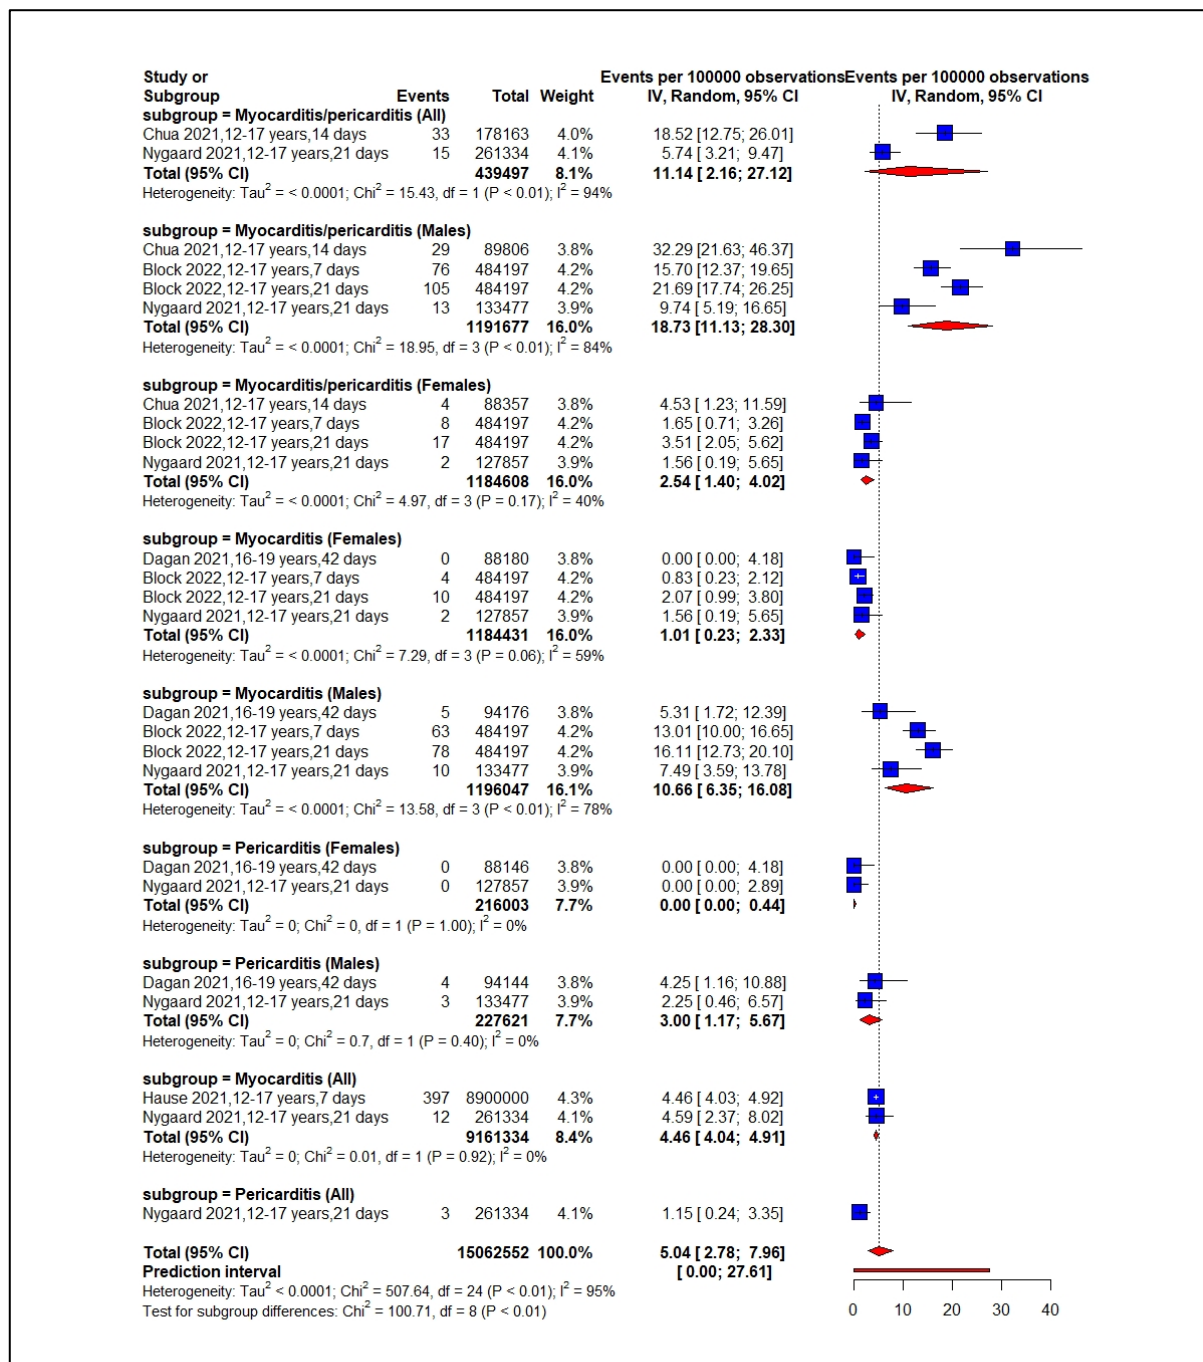

**Supplementary Figure 4: Pooled proportion of myocarditis or pericarditis or of myocarditis/pericarditis following any dose of BNT162b2 vaccination against COVID-19 among adolescents.** Subgroup are presented to consider sex. The pooled incidence of studied inflammatory heart conditions following any dose was 5.04 cases per 100,000 doses of BNT162b2 vaccine. The whisker represents the 95% confidence interval. The inclusion period of participants spanned from December 2020 to February 2022. Days indicate the period length after BNT162b2 vaccination used by the study. E.g.: 7 days will read as 0-7 days post BNT162b2 vaccination.



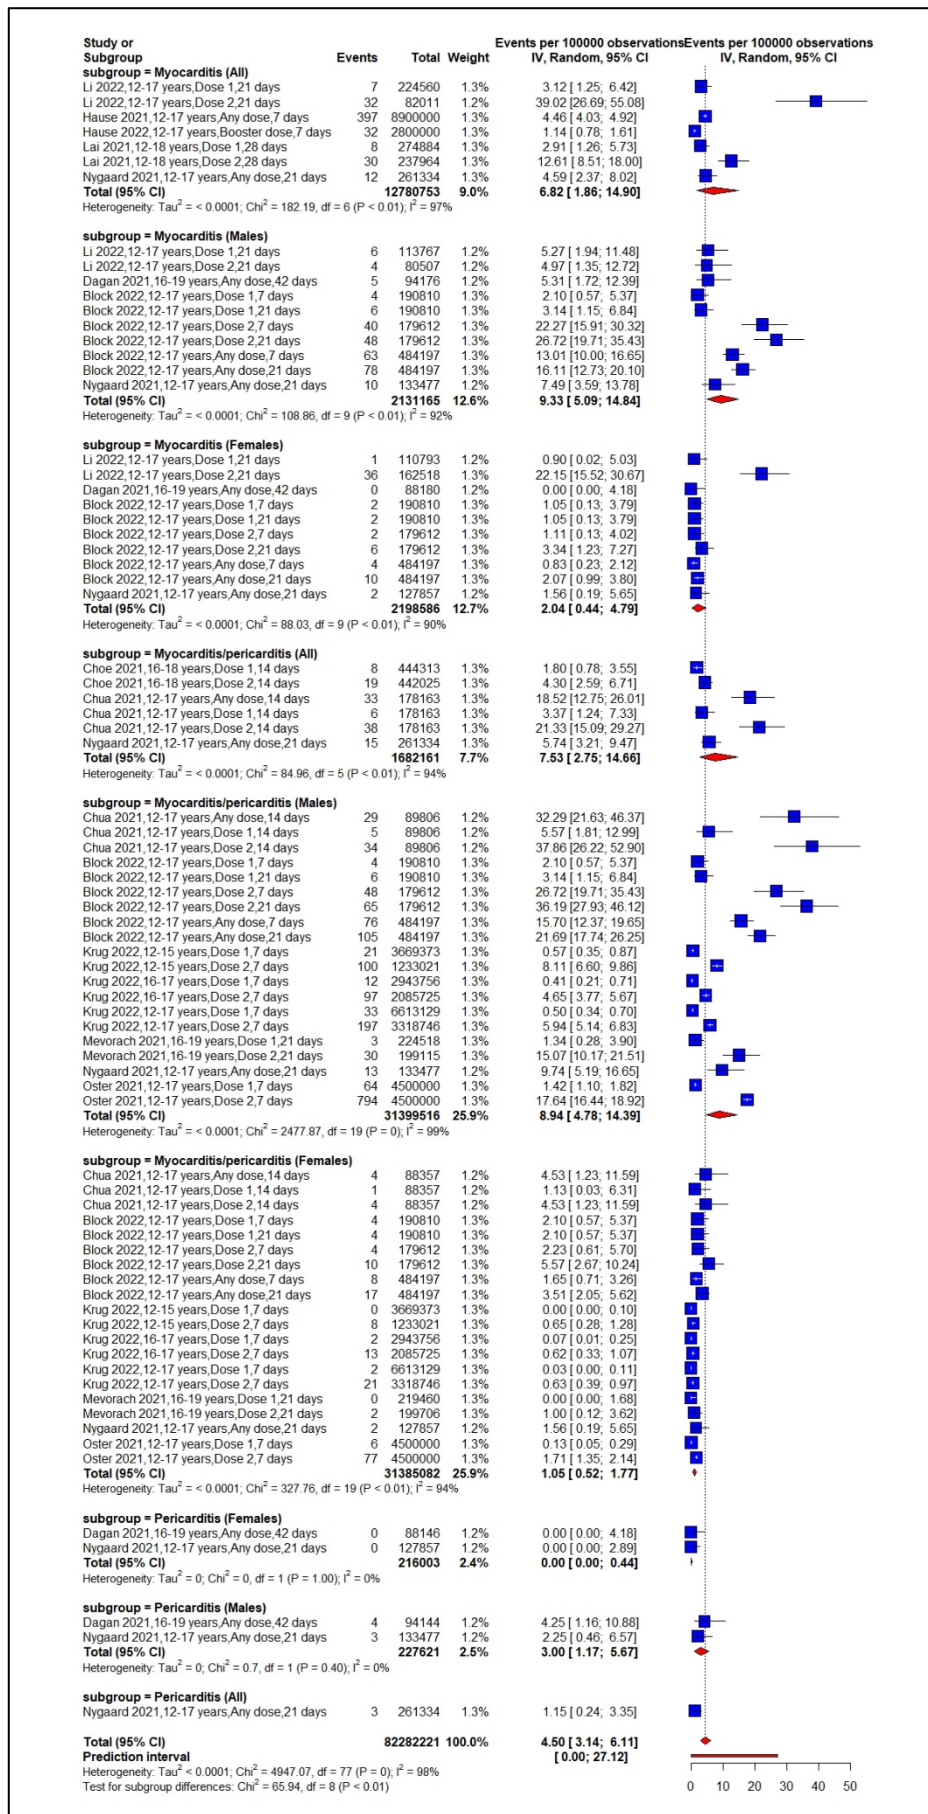

**Supplementary Figure 5: Pooled proportion of myocarditis or pericarditis or of myocarditis/pericarditis across all doses including booster dose of BNT162b2 vaccination against COVID-19 among adolescents.** Subgroup are presented to consider sex. The pooled incidence of studied inflammatory heart conditions across all doses was 4.50 cases per 100,000 doses of BNT162b2 vaccine. The whisker represents the 95% confidence interval. The inclusion period of participants spanned from December 2020 to February 2022. Days indicate the period length after BNT162b2 vaccination used by the study. E.g.: 7 days will read as 0-7 days post BNT162b2 vaccination.

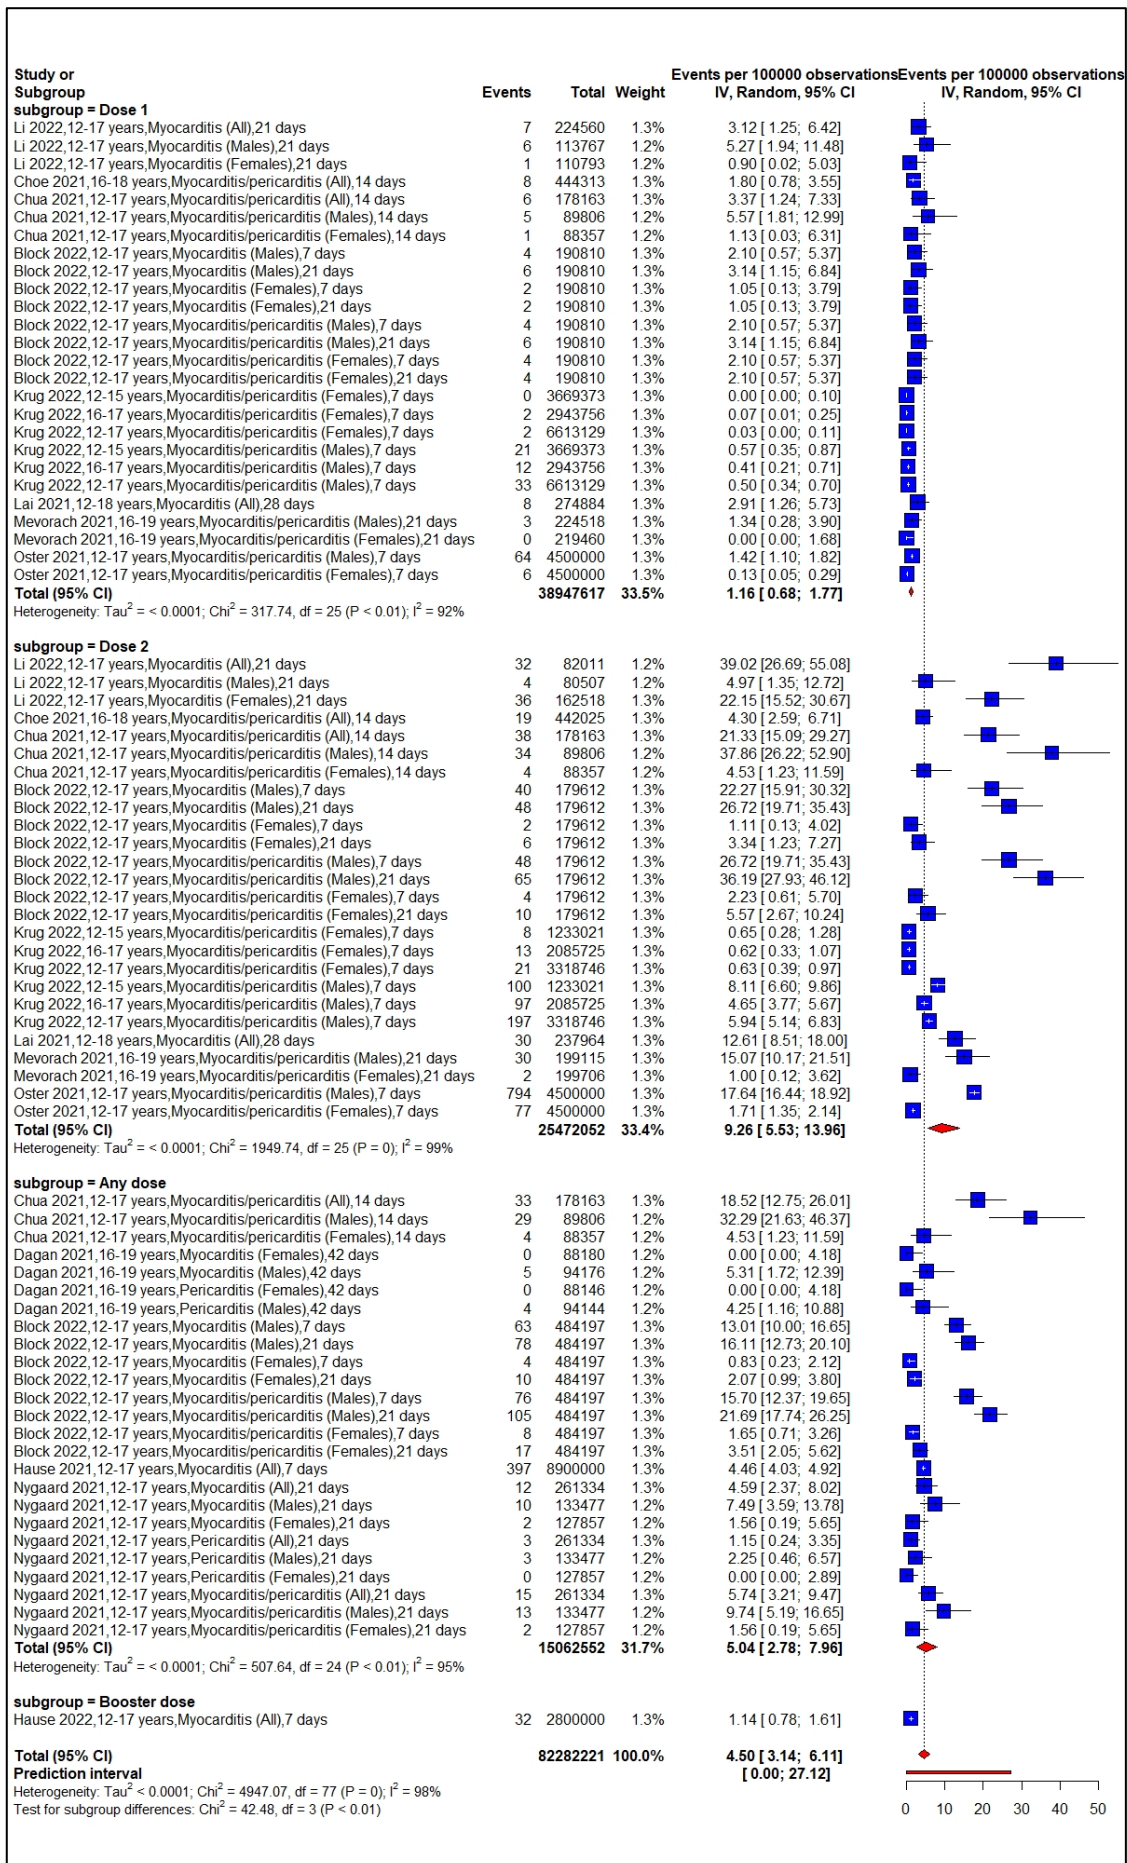

**Supplementary Figure 6: Pooled proportion of myocarditis or pericarditis or of myocarditis/pericarditis stratified by dose of BNT162b2 vaccination against COVID-19 among adolescents.** The whisker represents the 95% confidence interval. The inclusion period of participants spanned from December 2020 to February 2022



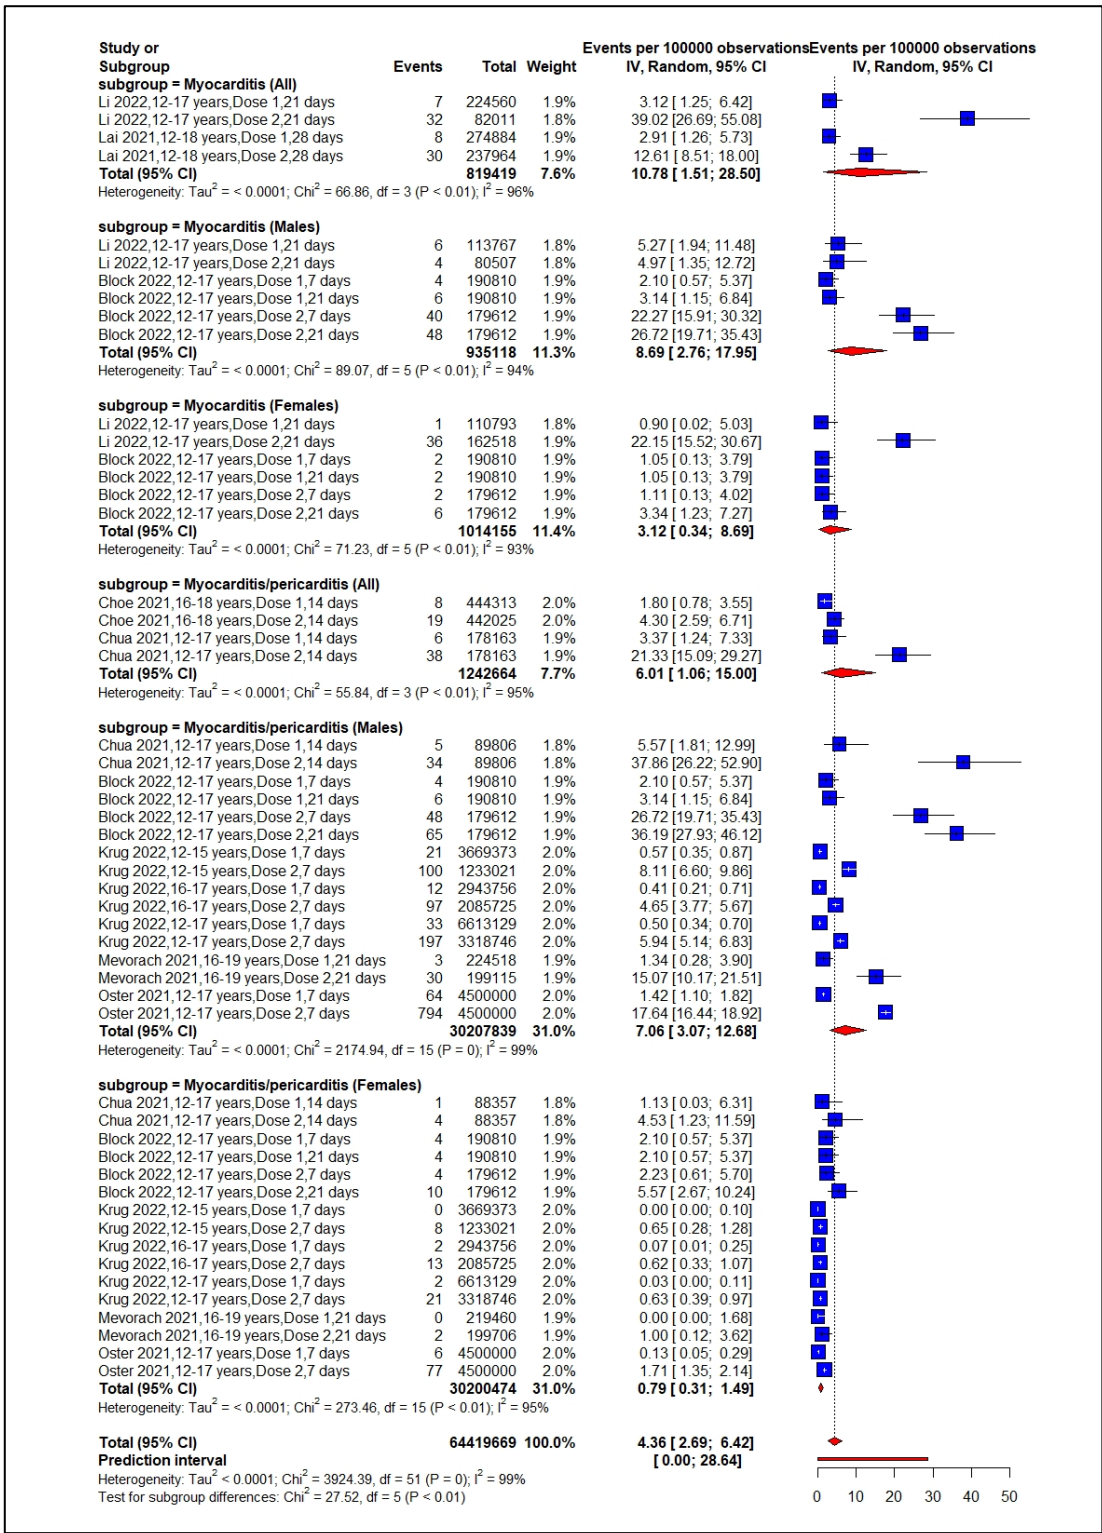

**Supplementary Figure 7: Pooled proportion of myocarditis or of myocarditis/pericarditis following primary doses of BNT162b2 vaccination against COVID-19 among adolescents.** The whisker represents the 95% confidence interval. The inclusion period of participants spanned from December 2020 to February 2022

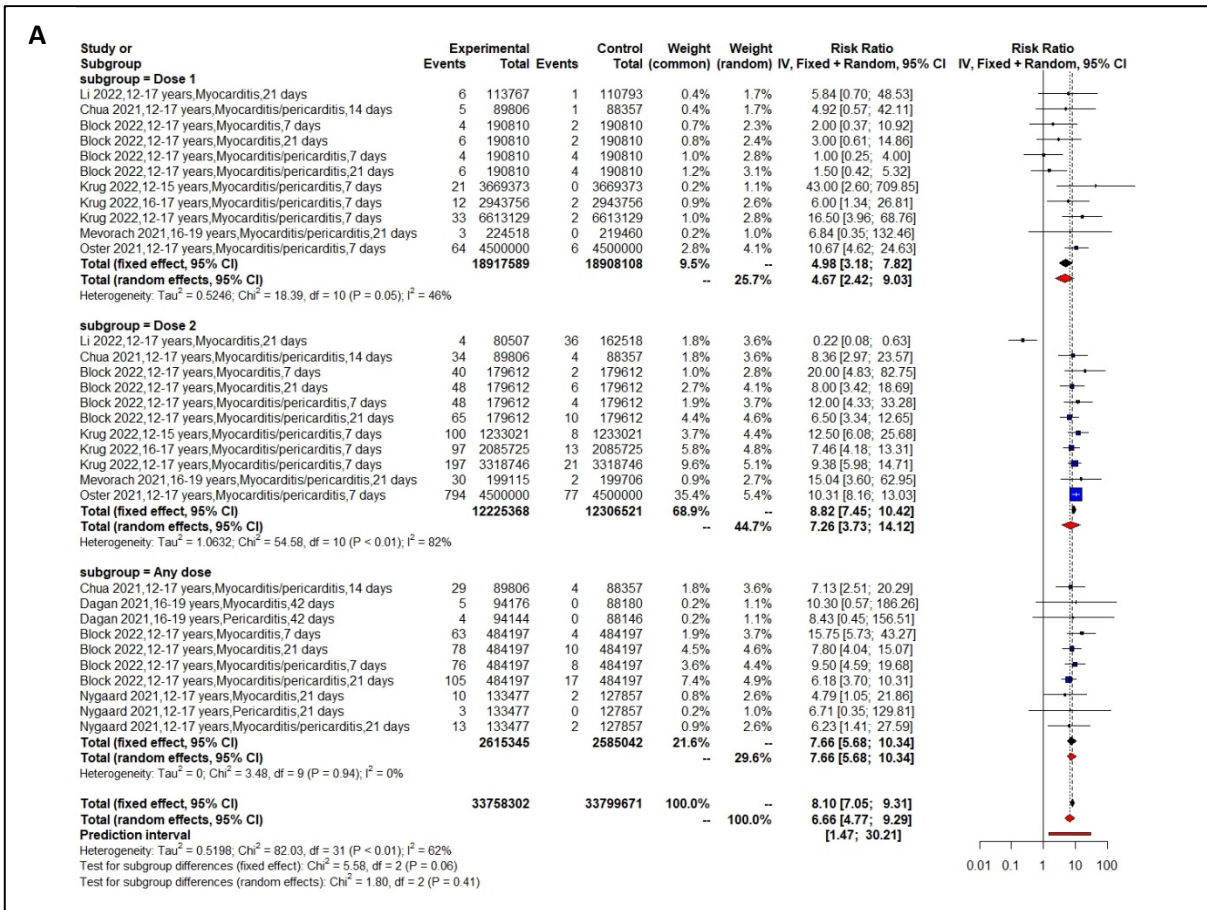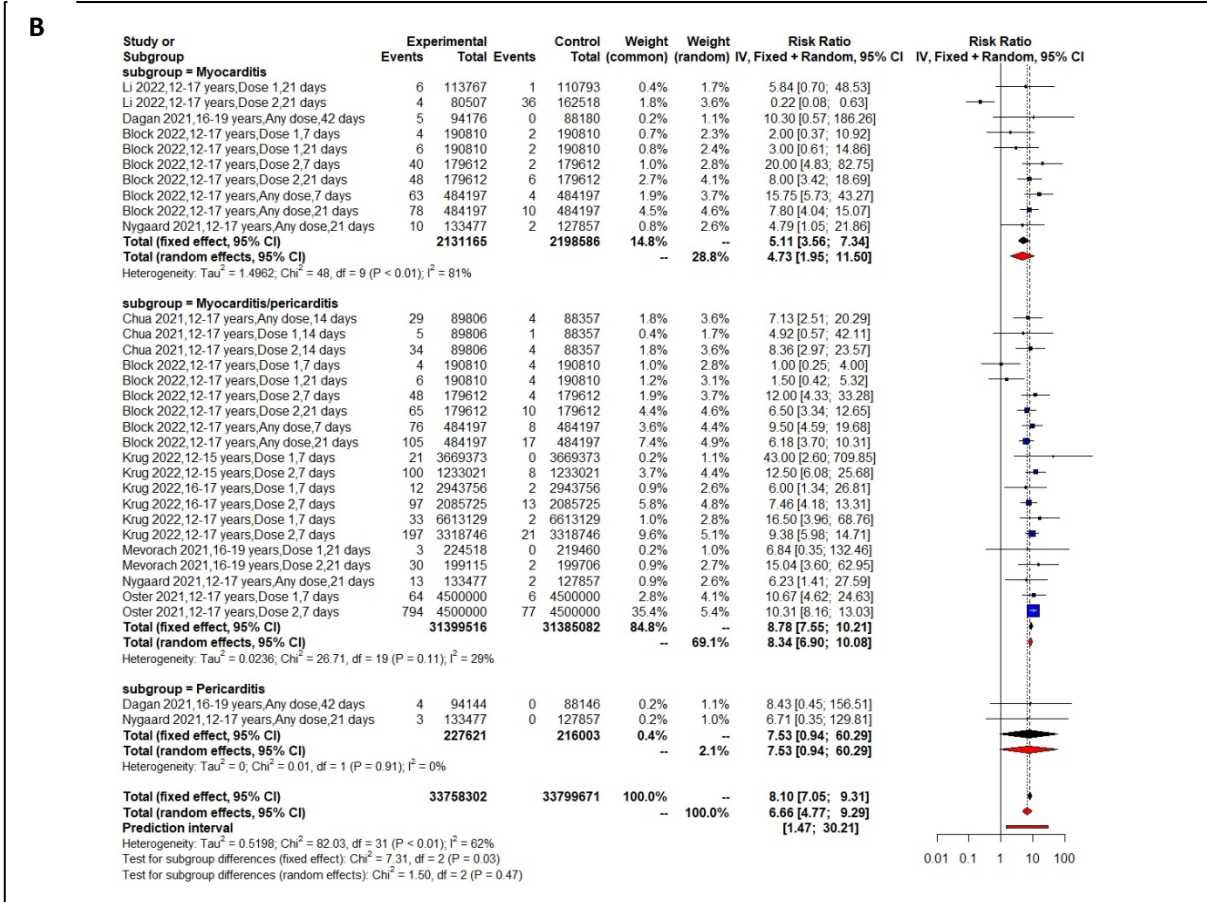

**Supplementary Figure 8: Comparing rates of myocarditis or of myocarditis/pericarditis by gender after BNT162b2 vaccination against COVID-19 among adolescents.** In panel A, subgroups are by type of dose while in panel B, subgroups consider type of inflammatory heart conditions. In both panels A and B, experimental refers to males and control to females. The whisker represents the 95% confidence interval. The inclusion period of participants spanned from December 2020 to February 2022. Days indicate the period length after BNT162b2 vaccination used by the study. E.g.: 7 days will read as 0-7 days post BNT162b2



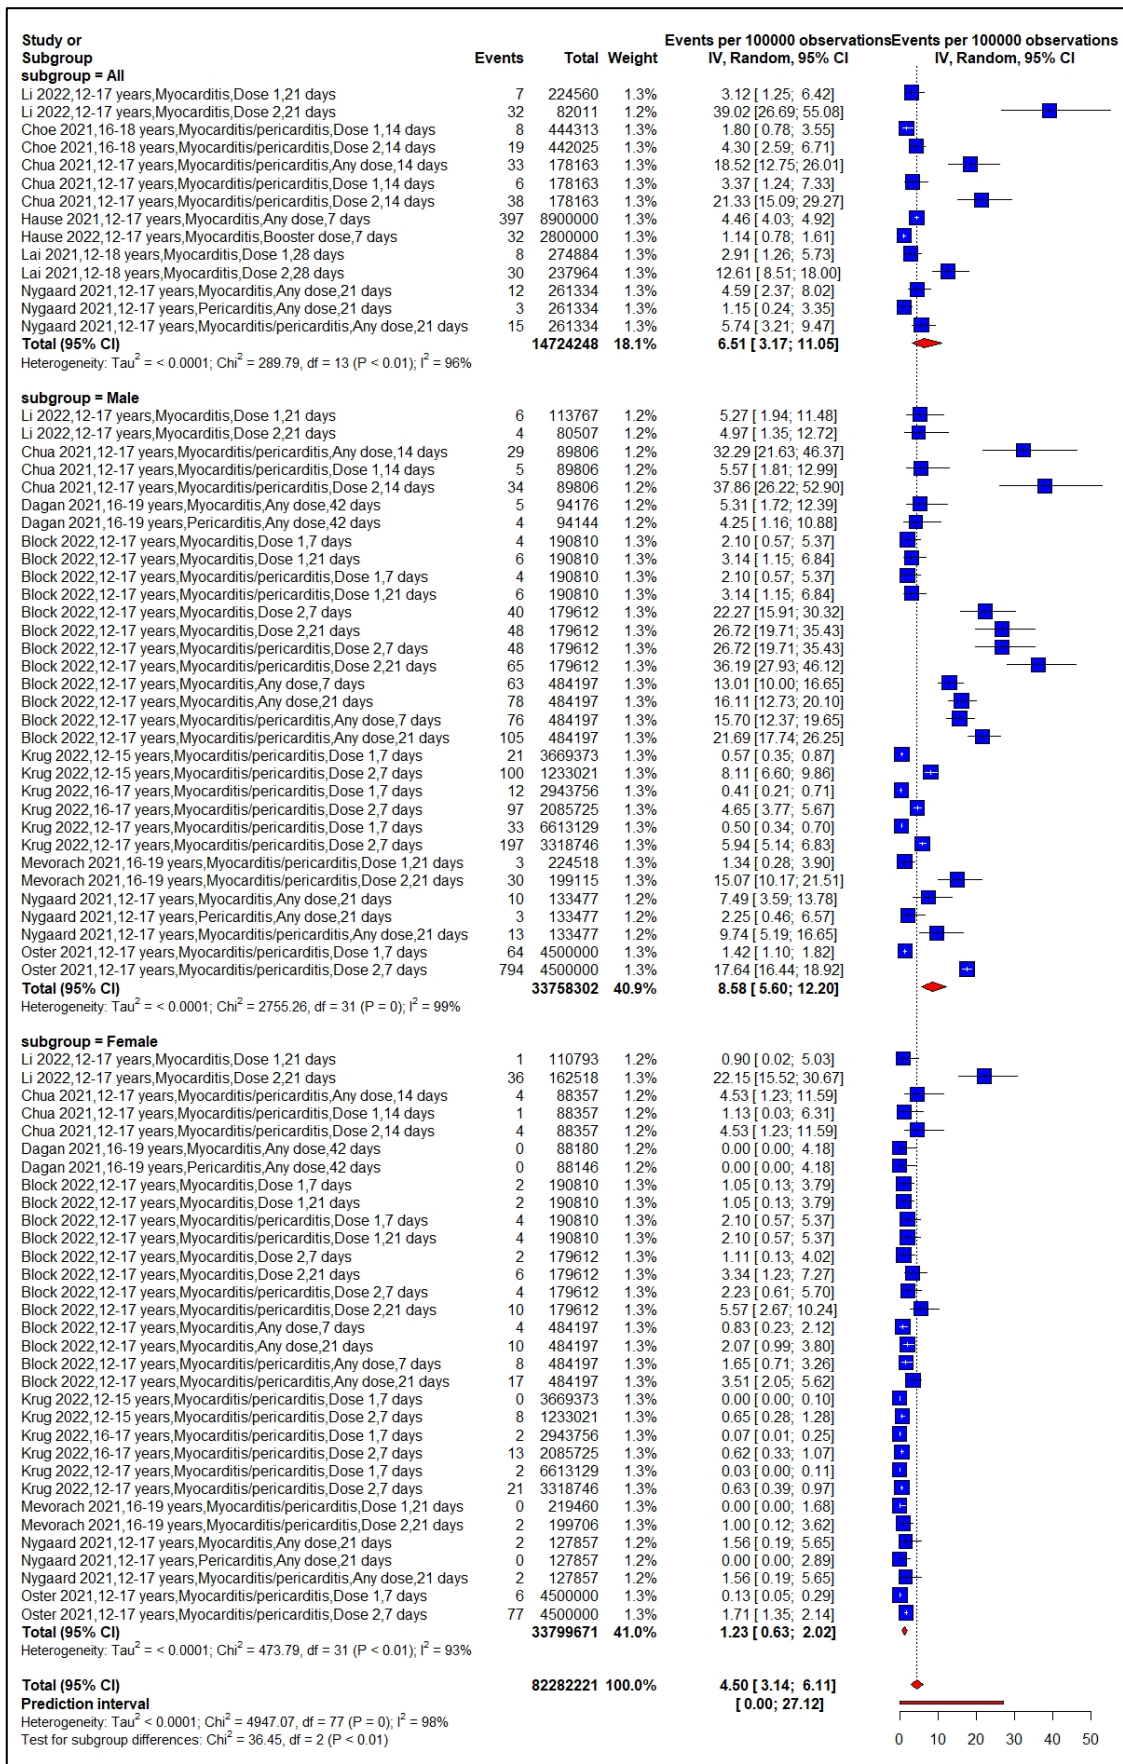

**Supplementary Figure 9: Pooled proportion of myocarditis or pericarditis stratified by sex after BNT162b2 vaccination against COVID-19 among adolescents.** The whisker represents the 95% confidence interval. The inclusion period of participants spanned from December 2020 to February 2022

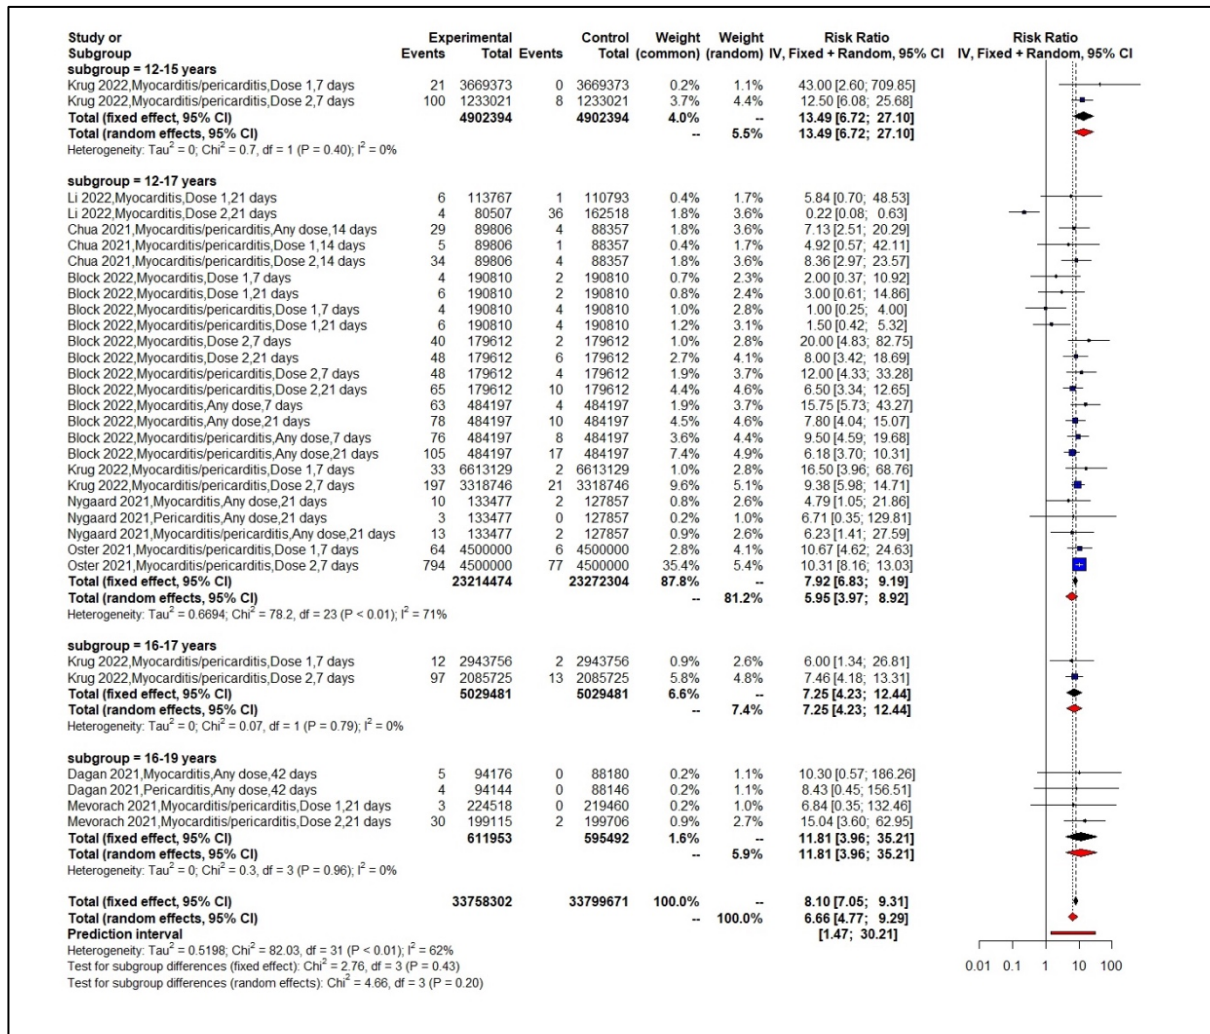

**Supplementary Figure 10: Comparing rates of myocarditis or of myocarditis/pericarditis by gender after BNT162b2 vaccination against COVID-19 among adolescents.** Subgroups are by age-groups. Experimental refers to males and control to females. The whisker represents the 95% confidence interval. The inclusion period of participants spanned from December 2020 to February 2022.



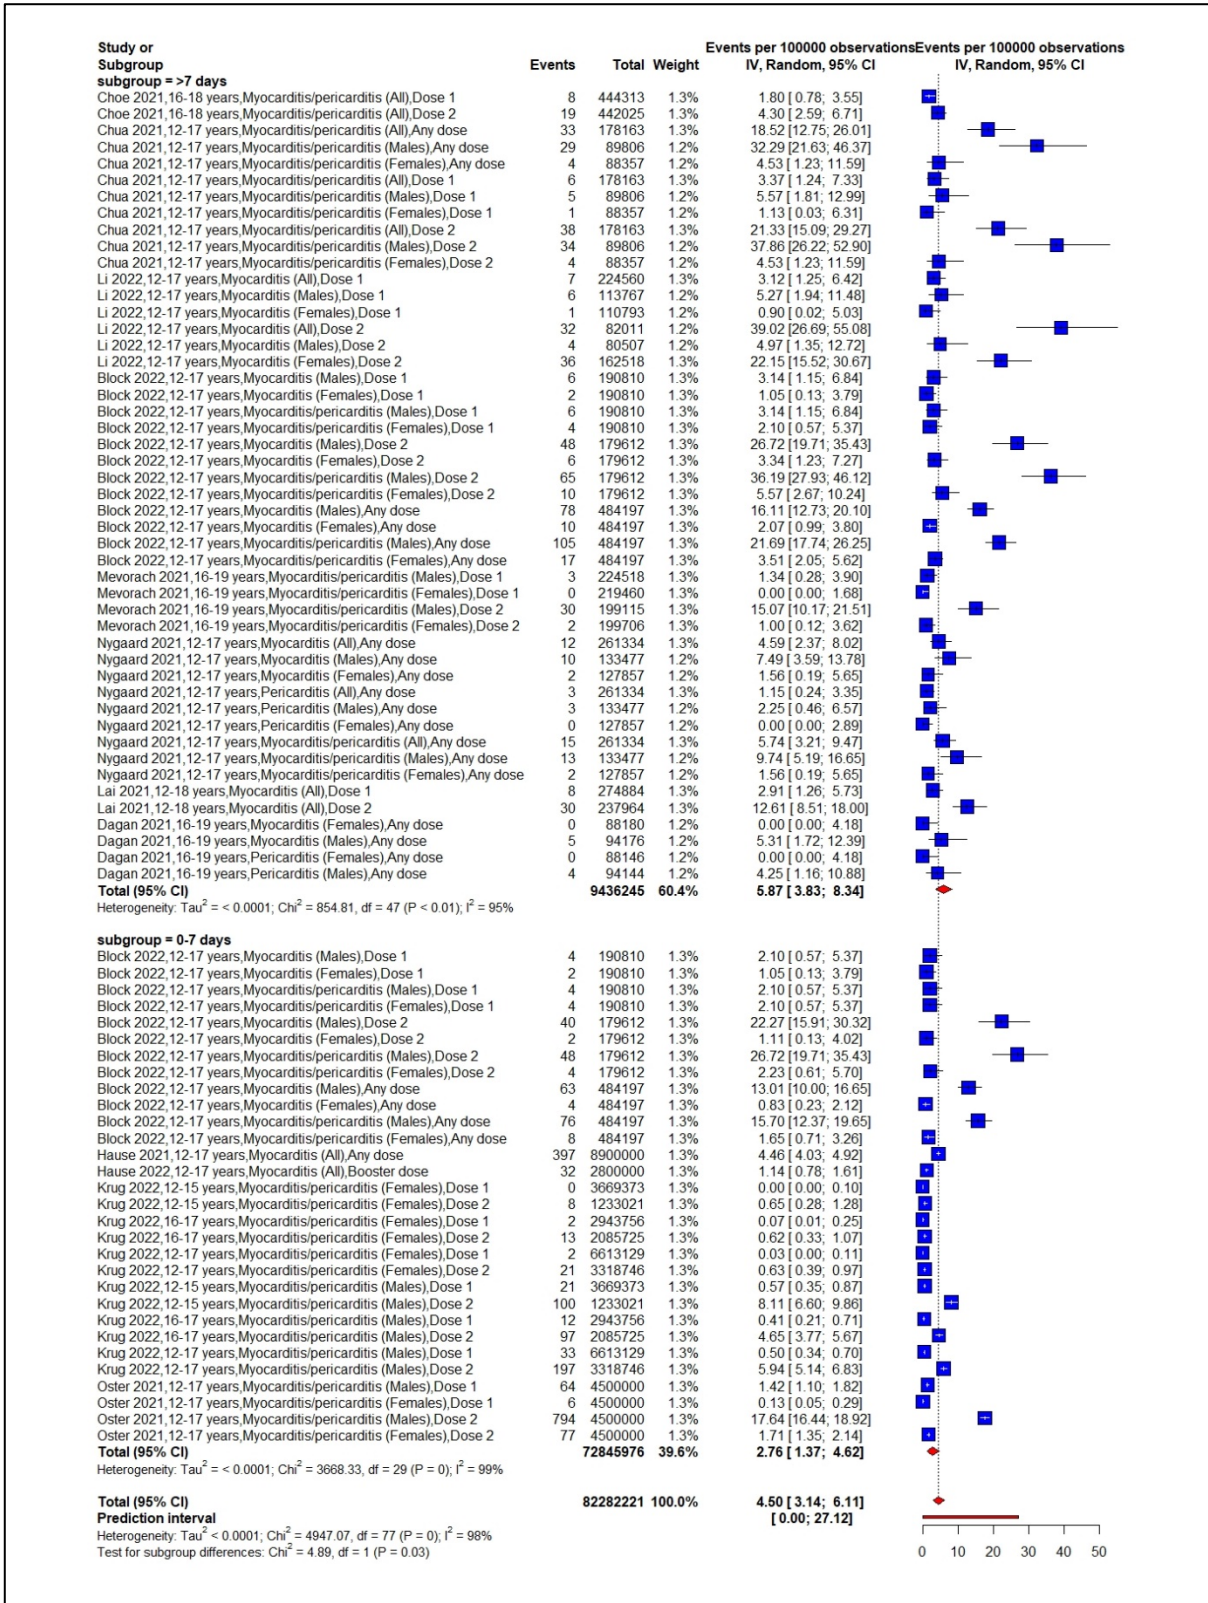

**Supplementary Figure 11: Pooled cumulative proportion of myocarditis or pericarditis or of myocarditis/pericarditis before and after seven reporting days of BNT162b2 vaccination against COVID-19 among adolescents.** The whisker represents the 95% confidence interval. The inclusion period of participants spanned from December 2020 to February 2022

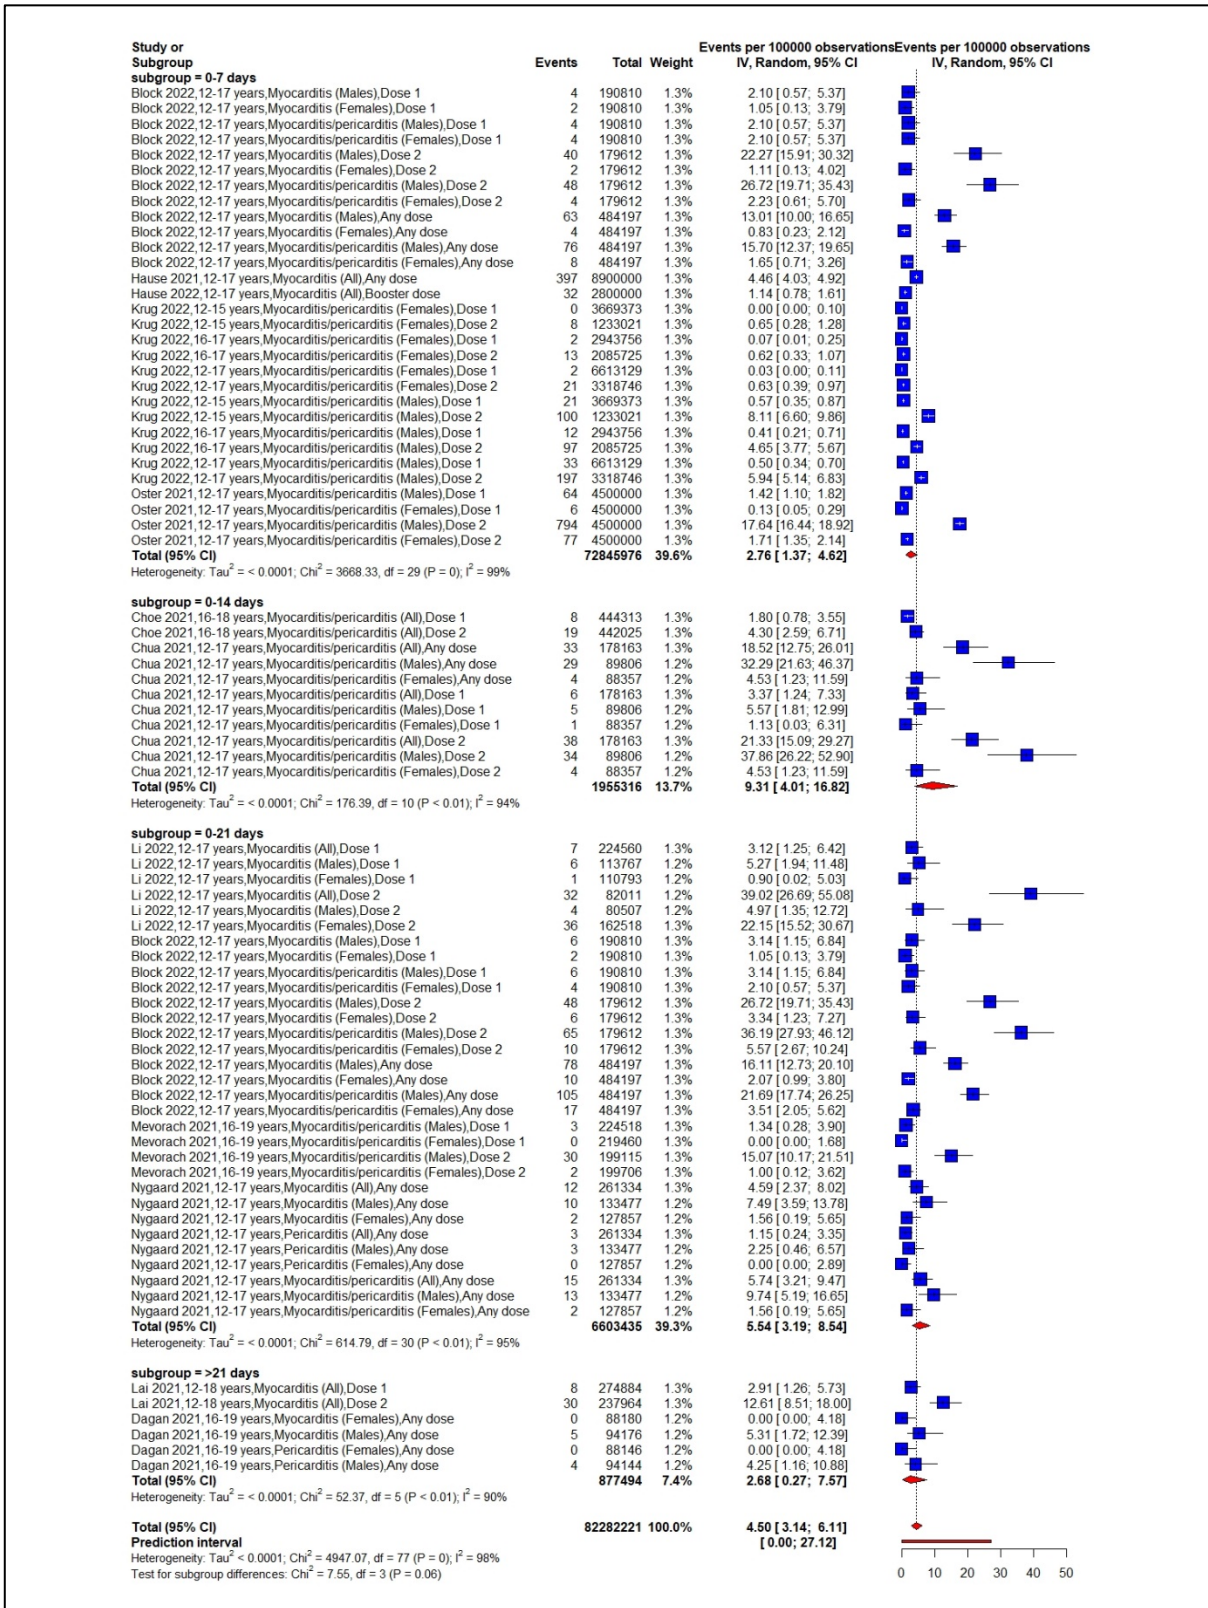

**Supplementary Figure 12: Pooled cumulative proportion of myocarditis or pericarditis or of myocarditis/pericarditis reported after each seven days period across all doses including booster dose of BNT162b2 vaccination against COVID-19 among adolescents.** The whisker represents the 95% confidence interval. The inclusion period of participants spanned from December 2020 to February 2022



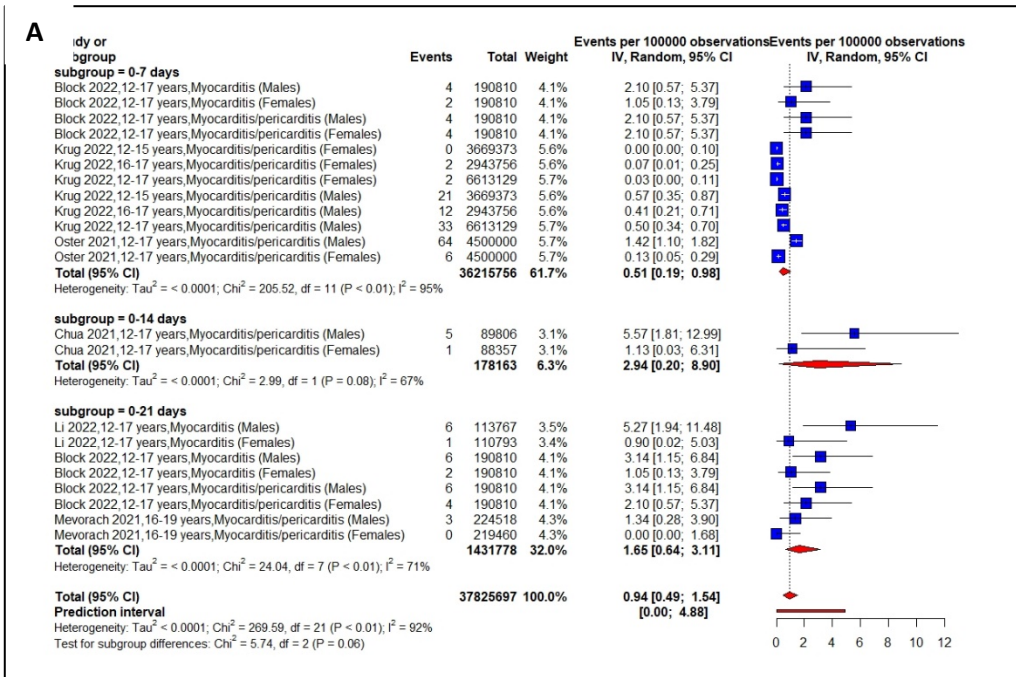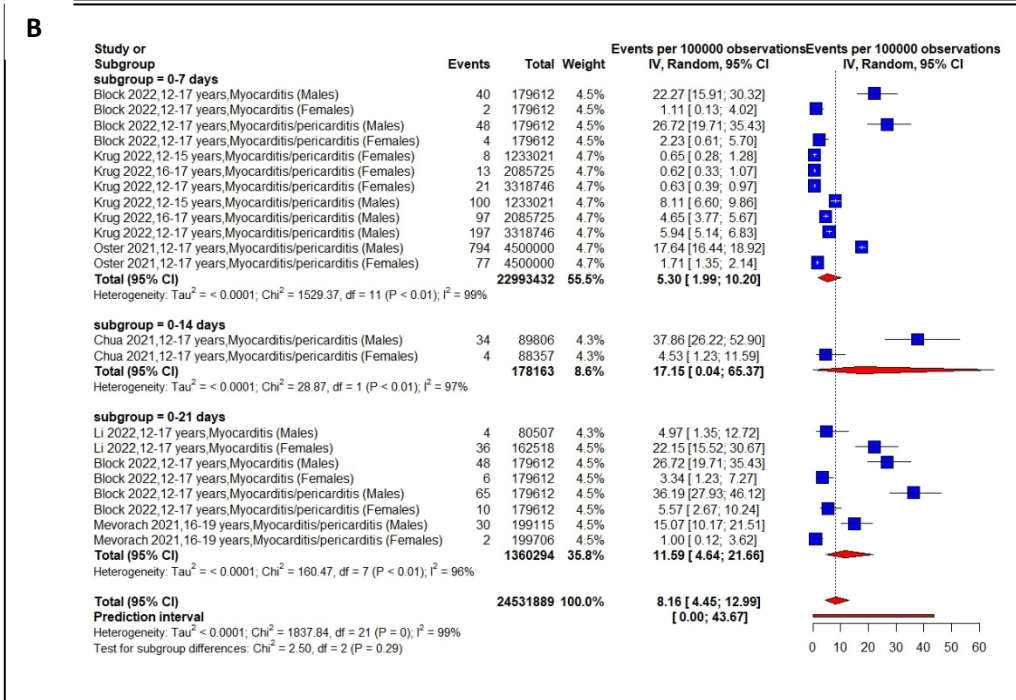

**Supplementary Figure 13: Pooled cumulative proportion of myocarditis or pericarditis or of myocarditis/pericarditis reported after each seven days period after the first (Panel A) and the second dose (Panel B) of BNT162b2 vaccination against COVID-19 among adolescents. The whisker represents the 95% confidence interval. The inclusion period of participants spanned from December 2020 to February 2022**

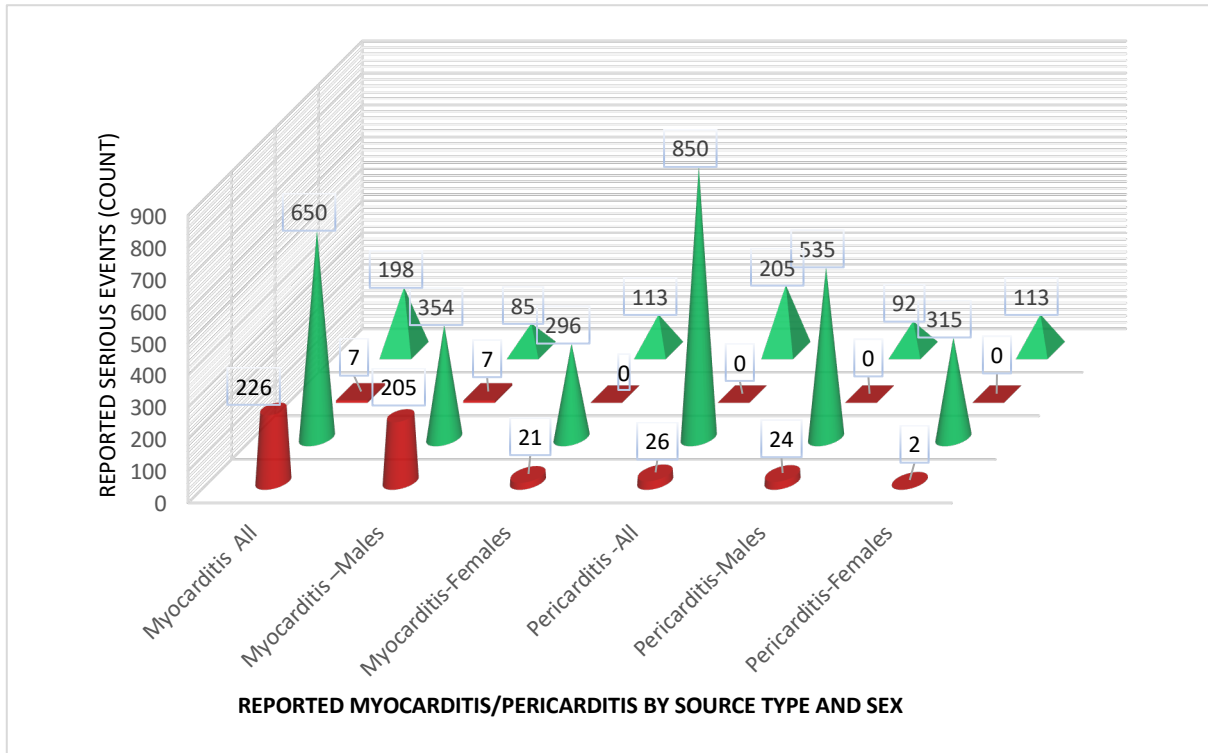

**Supplementary Figure 14: Reporting of myopericarditis among adolescents aged 12-17 years using data from the passive surveillance, nested in the World Health Organisation database (VigiBase) of spontaneous reports (adapted from Chouchana et al 2022). Partial cones (red) represent reporting number of myopericarditis in mRNA COVID-19 vaccine recipients (12-17 years) according to patient sex within the WHO global safety database compared to reported serious reports (green full cones). Partial pyramids (red) represent reporting number of myopericarditis in mRNA COVID-19 vaccine recipients (12-17 years) according to patient sex within the WHO global safety database compared to serious report originating from healthcare professionals only (full pyramids, red).**

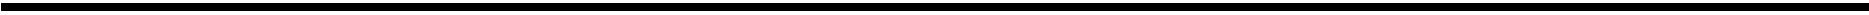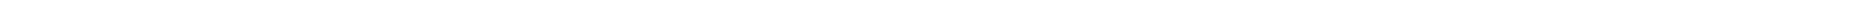

## References

1. Block, J. P. Cardiac Complications After SARS-CoV-2 Infection and mRNA COVID-19 Vaccination — PCORnet, United States, January 2021–January 2022. *MMWR Morb Mortal Wkly Rep* **71**, (2022).
2. Chua, G. T. *et al.* Epidemiology of Acute Myocarditis/Pericarditis in Hong Kong Adolescents Following Comirnaty Vaccination. *Clin Infect Dis* (2021) doi:10.1093/cid/ciab989.
3. Chouchana, L. *et al.* Features of Inflammatory Heart Reactions Following mRNA COVID-19 Vaccination at a Global Level. *Clin Pharmacol Ther* **111**, 605–613 (2022).
4. Karlstad, Ø. *et al.* SARS-CoV-2 Vaccination and Myocarditis in a Nordic Cohort Study of 23 Million Residents. *JAMA Cardiology* **7**, 600–612 (2022).
5. Li, X. *et al.* Myocarditis Following COVID-19 BNT162b2 Vaccination Among Adolescents in Hong Kong. *JAMA Pediatr* (2022) doi:10.1001/jamapediatrics.2022.0101.
6. Funk, P. R. *et al.* Benefit-risk assessment of COVID-19 vaccine, mRNA (Comirnaty) for age 16-29 years. *Vaccine* **40**, 2781–2789 (2022).
7. Krug, A., Stevenson, J. & Høeg, T. B. BNT162b2 Vaccine-Associated Myo/Pericarditis in Adolescents: A Stratified Risk-Benefit Analysis. *European Journal of Clinical Investigation* **n/a**, e13759.
8. Nygaard, U. *et al.* Population-based Incidence of Myopericarditis After COVID-19 Vaccination in Danish Adolescents. *Pediatr Infect Dis J* **41**, e25–e28 (2022).
9. Oster, M. E. *et al.* Myocarditis Cases Reported After mRNA-Based COVID-19 Vaccination in the US From December 2020 to August 2021. *JAMA* **327**, 331–340 (2022).
10. Yap, J. *et al.* Pericarditis and myocarditis after COVID-19 mRNA vaccination in a nationwide setting. *Ann Acad Med Singap* **51**, 96–100 (2022).



11. Das, B. B. *et al.* Myopericarditis after messenger RNA Coronavirus Disease 2019 Vaccination in Adolescents 12 to 18 Years of Age. *J Pediatr* **238**, 26-32.e1 (2021).
12. Foltran, D. *et al.* Myocarditis and pericarditis in adolescents after first and second doses of mRNA COVID-19 vaccines. *Eur Heart J Qual Care Clin Outcomes* **8**, 99–103 (2022).
13. Gurdasani, D. *et al.* Vaccinating adolescents against SARS-CoV-2 in England: a risk-benefit analysis. *J R Soc Med* **114**, 513–524 (2021).
14. Dagan, N., Barda, N. & Balicer, R. D. Adverse Effects after BNT162b2 Vaccine and SARS-CoV-2 Infection, According to Age and Sex. *N Engl J Med* **385**, 2299 (2021).
15. Hause, A. M. COVID-19 Vaccine Safety in Adolescents Aged 12–17 Years — United States, December 14, 2020–July 16, 2021. *MMWR Morb Mortal Wkly Rep* **70**, (2021).
16. Hause, A. M. Safety Monitoring of COVID-19 Vaccine Booster Doses Among Persons Aged 12–17 Years — United States, December 9, 2021–February 20, 2022. *MMWR Morb Mortal Wkly Rep* **71**, (2022).
17. Mevorach, D. *et al.* Myocarditis after BNT162b2 Vaccination in Israeli Adolescents. *N Engl J Med* **386**, 998–999 (2022).
18. Jain, S. S. *et al.* COVID-19 Vaccination-Associated Myocarditis in Adolescents. *Pediatrics* **148**, e2021053427 (2021).
19. June Choe, Y. *et al.* Safety and effectiveness of BNT162b2 mRNA Covid-19 vaccine in adolescents. *Vaccine* **40**, 691–694 (2022).
20. Lai, F. T. T. *et al.* Adverse events of special interest following the use of BNT162b2 in adolescents: a population-based retrospective cohort study. *Emerg Microbes Infect* **11**, 885–893 (2022).
